# Supplementary material for: Association of predicted pathogenic mutations in mitochondrial ND genes with distant metastasis in NSCLC and colon cancer
Source: PubMed Central journal article supplement (PMC5686070; doi:10.1038/s41598-017-15592-2), 2017-11-14
Supplement: 41598_2017_15592_MOESM1_ESM.pdf [file 41598_2017_15592_MOESM1_ESM.pdf]

**Title:** Association of predicted pathogenic mutations in mitochondrial *ND* genes with distant metastasis in NSCLC and colon cancer

**Authors:** Nobuko Koshikawa<sup>1</sup>, Miho Akimoto<sup>2\*</sup>, Jun-Ichi Hayashi<sup>3</sup>, Hiroki Nagase<sup>1</sup>, Keizo Takenaga<sup>2</sup>

**Affiliations:**

<sup>1</sup>Laboratory of Cancer Genetics, Chiba Cancer Center Research Institute, 666-2 Nitona, Chuoh-ku, Chiba 260-8717, Japan

<sup>2</sup>Department of Life Science, Shimane University Faculty of Medicine, 89-1 Enya, Izumo, Shimane 693-8501, Japan

<sup>3</sup>University of Tsukuba, 1-1-1 Tennodai, Tsukuba, Ibaraki 305-8572, Japan

**Corresponding author:** Takenaga K. [biokeizo@med.shimane-u.ac.jp](mailto:biokeizo@med.shimane-u.ac.jp)

\*Present address: Department of Biochemistry, Teikyo University School of Medicine, 2-11-1 Kaga, Itabashi-ku, Tokyo 173-8605, Japan

Supplementary Table S1. Nonsynonymous SNPs and SNVs in the *ND* genes in NSCLC and colon cancer clinical samples.

| NSCLC primary tissue (45 cases) |         |                         |                                 | None                                                         | Conserved amino acid substitution                             | Novel mutation                    |                |                 |                                                                 |                |                                    |                                |                                                                                          |                                                    |
|---------------------------------|---------|-------------------------|---------------------------------|--------------------------------------------------------------|---------------------------------------------------------------|-----------------------------------|----------------|-----------------|-----------------------------------------------------------------|----------------|------------------------------------|--------------------------------|------------------------------------------------------------------------------------------|----------------------------------------------------|
| ID                              | Age/Sex | Histology               | TNM*1                           | ND1                                                          | ND2                                                           | ND3                               | ND4L           | ND4             | ND5                                                             | ND6            | COII                               | ATP6                           | CYTB                                                                                     |                                                    |
| LgCa-150                        | 71/M    | Squamous cell carcinoma | T3N2M0                          |                                                              | G4705A (M79T)<br>A4824G (T119A)                               |                                   |                |                 | T12880C (F182L)                                                 |                |                                    | A8563G (T13A)<br>C8794T (H90Y) | C14766T (T7I)<br>A15326G (T194A)                                                         |                                                    |
| LgCa-151                        | 57/M    | Squamous cell carcinoma | T2N0M0                          |                                                              |                                                               | A10398G (T114A)                   |                | G11696A (V313I) |                                                                 |                |                                    | A8701G (T59A)                  | C14766T (T7I)<br>A15326G (T194A)                                                         |                                                    |
| LgCa-152                        | 59/F    | Adenocarcinoma          | T4N0M0                          |                                                              |                                                               | A10398G (T114A)                   |                |                 |                                                                 |                |                                    | A8701G (T59A)                  | C14766T (T7I)<br>T14979C (I78T)<br>A15326G (T194A)                                       |                                                    |
| LgCa-153                        | 64/M    | Large cell carcinoma    | T4N2M1<br>(Mediastinal LN meta) |                                                              |                                                               | A10398G (T114A)                   |                | A11084G (T109A) |                                                                 |                | G8075A (A164T)                     | A8531G (N2S)<br>A8701G (T59A)  | C14766T (T7I)<br>A15326G (T194A)                                                         |                                                    |
| LgCa-154                        | 76/F    | Squamous cell carcinoma | T1N0M0                          |                                                              |                                                               | A10398G (T114A)                   |                |                 |                                                                 |                |                                    | A8701G (T59A)<br>T8762C (I79T) | C14766T (T7I)<br>A15326G (T194A)                                                         |                                                    |
| LgCa-157                        | 63/M    | Squamous cell carcinoma | T1N0M0                          |                                                              |                                                               | A10398G (T114A)                   |                |                 |                                                                 |                |                                    | A8701G (T59A)                  | C14766T (T7I)<br>A15326G (T194A)                                                         |                                                    |
| LgCa-159                        | 59/M    | Squamous cell carcinoma | T2N1M0                          |                                                              | A4833G (T122A)                                                | A10398G (T114A)                   |                |                 | G12622A (V96I)                                                  |                |                                    | A8701G (T59A)                  | C14766T (T7I)<br>A15326G (T194A)                                                         |                                                    |
| LgCa-161                        | 71/M    | Adenocarcinoma          | T2N1M0                          |                                                              |                                                               | A10398G (T114A)                   |                | A11084G (T109A) |                                                                 |                |                                    | A8701G (T59A)                  | C14766T (T7I)<br>A15326G (T194A)                                                         |                                                    |
| LgCa-162                        | 62/M    | Large cell carcinoma    | T1N0M0                          | G4048A (D248N)                                               | G5460A(A331T)                                                 | T10345C (I96T)<br>T10398G (T114A) |                |                 | T12811C (Y159H)                                                 |                | G7653A (V90I)                      | A8701G (T59A)                  | C14766T (T7I)<br>A15326G (T194A)                                                         |                                                    |
| LgCa-163                        | 57/M    | Adenocarcinoma          | T1N0M0                          |                                                              |                                                               | A10398G (T114A)                   |                |                 | G13708A (A458T)                                                 |                |                                    | A8701G (T59A)                  | C14766T (T7I)<br>A15326G (T194A)                                                         |                                                    |
| LgCa-164                        | 37/M    | Adenocarcinoma          | T1N0M0                          |                                                              |                                                               | A10398G (T114A)                   |                | A11084G (T109A) |                                                                 |                |                                    | A8701G (T59A)                  | C14766T (T7I)<br>A15326G (T194A)                                                         |                                                    |
| LgCa-165                        | 79/F    | Adenocarcinoma          | T2N2M0                          |                                                              |                                                               | A10398G (T114A)                   |                |                 |                                                                 |                |                                    | A8701G (T59A)                  | C14766T (T7I)<br>T14979C (I78T)<br>A15326G (T194A)                                       |                                                    |
| LgCa-166                        | 71/M    | Squamous cell carcinoma | T4N2M0                          |                                                              |                                                               |                                   |                |                 | A12358G (T8A)                                                   |                |                                    |                                | C14766T (T7I)<br>A15326G (T194A)                                                         |                                                    |
| LgCa-167                        | 56/F    | Adenocarcinoma          | T1N0M0                          |                                                              |                                                               |                                   |                |                 | A12358G (T8A)                                                   |                |                                    |                                | C14766T (T7I)<br>A15326G (T194A)                                                         |                                                    |
| LgCa-168                        | 61/F    | Adenocarcinoma          | T1N0M0                          |                                                              |                                                               | A10398G (T114A)                   |                |                 | G13477A (A381T)                                                 | T14502C (I58V) |                                    | A8701G (T59A)                  | C14766T (T7I)<br>A14870G (I42V)<br>T15071C (Y109H)<br>A15218G (T158A)<br>A15326G (T194A) |                                                    |
| LgCa-169                        | 72/M    | Squamous cell carcinoma | T1N1M0                          | G3391A (G29S)<br>G3709A (A135T)<br>(heteroplasmy or mixture) |                                                               | A10398G (T114A)                   |                |                 |                                                                 |                |                                    | A8701G (T59A)                  | C14766T (T7I)<br>A15326G (T194A)                                                         |                                                    |
| LgCa-173                        | 74/M    | Squamous cell carcinoma | T3N0M0                          |                                                              | T5344C (F292S)<br>(heteroplasmy or mixture)<br>G5460A (A331T) | T10345C (I96T)<br>T10398G (T114A) |                |                 | T12811C (Y159H)<br>G13103A (G256E)<br>(heteroplasmy or mixture) |                | A case with two selected mutations | G7853A (V90I)                  | A8701G (T59A)                                                                            | C14766T (T7I)<br>G14804A (D20N)<br>A15326G (T194A) |
| LgCa-174                        | 59/M    | Adenocarcinoma          | T2N1M0                          |                                                              | G4704A (M79L)<br>A4824G (T119A)                               |                                   |                |                 |                                                                 |                |                                    | A8563G (T13A)<br>C8794T (H90Y) | C14766T (T7I)<br>A15326G (T194A)                                                         |                                                    |
| LgCa-175                        | 46/F    | Adenocarcinoma          | T1N0M0                          |                                                              |                                                               |                                   |                |                 |                                                                 |                |                                    | T9101G (I192S)<br>(homoplasmy) | C14766T (T7I)<br>A15326G (T194A)                                                         |                                                    |
| LgCa-176                        | 80/M    | Squamous cell carcinoma | T1N0M0                          |                                                              | T4705C (M79T)<br>A4732G (N88S)                                |                                   | T10609C (M47T) |                 | G12406A (V24I)<br>G13928C (S531T)                               |                |                                    |                                | C14766T (T7I)<br>A15326G (T194A)                                                         |                                                    |
| LgCa-177                        | 43/F    | Squamous cell carcinoma | T1N0M0                          |                                                              |                                                               | A10398G (T114A)                   |                |                 |                                                                 |                |                                    | A8701G (T59A)                  | C14766T (T7I)<br>A15326G (T194A)                                                         |                                                    |
| LgCa-178                        | 58/M    | Squamous cell carcinoma | T1N1M0                          | T4216C (Y304H)                                               | A5301G (I278V)                                                | A10398G (T114A)                   |                |                 | A13105G (I257V)                                                 |                |                                    | A8701G (T59A)                  | C14766T (T7I)<br>A14927G (T61A)<br>A15326G (T194A)                                       |                                                    |

|          |      |                            |        |                |                                 |                                                                |                |                 |                                   |                 |
|----------|------|----------------------------|--------|----------------|---------------------------------|----------------------------------------------------------------|----------------|-----------------|-----------------------------------|-----------------|
| LgCa-179 | 54/F | Adenocarcinoma             | T1N0M0 |                |                                 | A10398G (T114A)                                                |                |                 |                                   |                 |
| LgCa-180 | 68/M | Adenocarcinoma             | T2N1M0 |                | A4824G (T119A)                  |                                                                |                |                 | T12880C (F182L)                   |                 |
| LgCa-181 | 64/M | Squamous cell carcinoma    | T1N2M0 |                |                                 | A10398G (T114A)                                                |                |                 |                                   |                 |
| LgCa-182 | 46/M | Adenocarcinoma             | T1N2M0 |                |                                 | A10398G (T114A)                                                |                | A11084G (T109A) |                                   |                 |
| IgCa-183 | 67/M | Squamous cell carcinoma    | T2N0M0 |                |                                 |                                                                |                |                 |                                   |                 |
| LgCa-184 | 52/M | Pleomorphic carcinoma      | T3N0M0 |                |                                 |                                                                |                |                 | A12358G (T8A)                     |                 |
| LgCa-187 | 73/M | Adenocarcinoma             | T1N0M0 |                | T4705C (M79T)<br>A4732G (N88S)  |                                                                | T10609C (M47T) |                 | G12406A (V24I)<br>G13928C (S531T) |                 |
| LgCa-188 | 59/M | Squamous cell carcinoma    | T1N0M0 |                |                                 | A10398G (T114A)                                                |                |                 |                                   |                 |
| LgCa-189 | 73/M | Squamous cell carcinoma    | T1N1M0 |                | A5301G (I278V)                  | A10398G (T114A)                                                |                |                 | A13651C (T439P)                   | T14319C (N119D) |
| LgCa-190 | 62/M | Adenocarcinoma             | T2N1M0 |                |                                 |                                                                |                | G11016A (S86N)  | A13183G (I283V)                   |                 |
| LgCa-191 | 50/M | Adenocarcinoma             | T2N2M0 |                |                                 | A10398G (T114A)                                                |                |                 | A12361G (T9A)                     |                 |
| LgCa-192 | 54/F | Adenocarcinoma             | T4N0M0 |                | G4705A (M79T)<br>A4824G (T119A) |                                                                |                |                 |                                   |                 |
| LgCa-193 | 76/M | Squamous cell carcinoma    | T1N0M0 |                |                                 | A10398G (T114A)                                                |                |                 |                                   |                 |
| LgCa-194 | 41/M | Adenocarcinoma             | T2N2M0 |                | A5301G (I278V)                  | A10398G (T114A)                                                |                |                 |                                   |                 |
| LgCa-195 | 66/M | Bronchioalveolar carcinoma | T1N0M0 |                |                                 |                                                                |                |                 |                                   |                 |
| LgCa-196 | 64/M | Adenocarcinoma             | T1N0M0 | C3497T (A64V)  | A4704C (M79L)                   |                                                                |                |                 |                                   |                 |
| LgCa-197 | 59/M | Bronchioalveolar carcinoma | T1N0M0 | T3394C (Y30H)  | G4491A (V8I)                    | G10290A (A78T)<br>(heteroplasmy or mixture)<br>A10389G (T114T) |                | G11963A (V402I) |                                   |                 |
| LgCa-198 | 35/M | Squamous cell carcinoma    | T?N1M0 |                |                                 | A10398G (T114A)                                                |                | A11084G (T109A) |                                   |                 |
| LgCa-199 | 63/M | Adenocarcinoma             | T1N1M0 |                |                                 |                                                                |                |                 | A12358G (T8A)                     |                 |
| LgCa-200 | 58/F | Adenocarcinoma             | T1N0M0 | G4048A (D248N) | G5460A (A331T)                  | T10345C (I96T)<br>T10389G (T114T)                              |                |                 | T12811C (Y159H)                   |                 |
| LgCa-201 | 64/M | Adenocarcinoma             | T1N0M0 |                |                                 | A10398G (T114A)                                                |                |                 | A12361G (T9A)                     |                 |
| LgCa-202 | 76/M | Adenocarcinoma             | T1N0M0 |                |                                 | A10398G (T114A)                                                |                |                 |                                   |                 |
| LgCa-205 | 74/F | Squamous cell carcinoma    | T1N1M0 |                |                                 | A10398G (T114A)                                                |                | G11696A (V313I) |                                   |                 |

\*1 TNM (Tumour/Node/Metastasis) classification for staging of cancer.

**NSCLC metastases (37 cases)**

| ID        | Age/Sex | Histology      | Metastatic site | None |     |                 |      |     |                 | Conserved amino acid substitution               | Novel mutation |
|-----------|---------|----------------|-----------------|------|-----|-----------------|------|-----|-----------------|-------------------------------------------------|----------------|
|           |         |                |                 | ND1  | ND2 | ND3             | ND4L | ND4 | ND5             | ND6                                             |                |
| LuAdBrM-1 | -       | Adenocarcinoma | Brain           |      |     | A10398G (T114A) |      |     | A11084G (T109A) | C12813A (Y159STOP)<br>(heteroplasmy or mixture) |                |

|               |                                |                                                                       |
|---------------|--------------------------------|-----------------------------------------------------------------------|
|               |                                | C14766T (T7I)<br>A15326G (T194A)                                      |
|               | A8563G (T13A)<br>C8794T (H90Y) | C14766T (T7I)<br>A15326G (T194A)                                      |
|               | G8584A (A20T)<br>A8701G (T59A) | C14766T (T7I)<br>A15326G (T194A)                                      |
|               | T8602C (F26L)<br>A8701G (T59A) | C14766T (T7I)<br>A15326G (T194A)                                      |
|               |                                | C14766T (T7I)<br>T14798C (F18L)<br>A15236G (I164V)<br>A15326G (T194A) |
|               |                                | C14766T (T7I)<br>A15326G (T194A)                                      |
|               | A8701G (T59A)                  | C14766T (T7I)<br>T14979C (I78T)<br>A15326G (T194A)                    |
|               | A8701G (T59A)                  | C14766T (T7I)<br>A15326G (T194A)                                      |
|               |                                | C14766T (T7I)<br>A15326G (T194A)                                      |
|               | G8584A (A20T)                  | C14766T (T7I)<br>A15326G (T194A)                                      |
|               | A8563G (T13A)<br>C8794T (H90Y) | C14766T (T7I)<br>A15326G (T194A)                                      |
|               | A8701G (T59A)                  | C14766T (T7I)<br>A15326G (T194A)                                      |
|               | A8701G (T59A)                  | C14766T (T7I)<br>A15326G (T194A)                                      |
|               |                                | C14766T (T7I)<br>A15326G (T194A)                                      |
|               | A8701G (T59A)                  | C14766T (T7I)<br>A15326G (T194A)                                      |
|               |                                | C14766T (T7I)<br>A15326G (T194A)                                      |
| G7853A (V90I) | A8701G (T59A)                  | C14766T (T7I)<br>A15326G (T194A)                                      |
|               | G8584A (A20T)                  | C14766T (T7I)<br>G14985A (R80H)<br>A15326G (T194A)                    |
|               | A8701G (T59A)                  | C14766T (T7I)<br>A15326G (T194A)                                      |
|               | A8701G (T59A)                  | C14766T (T7I)<br>A15326G (T194A)                                      |

| COI1 | ATP6          | CYT6                             |
|------|---------------|----------------------------------|
|      | A8701G (T59A) | C14766T (T7I)<br>A15326G (T194A) |

|            |      |                |       |                                             |                                                               |                                              |                |                                              |                 |                                                   |  |
|------------|------|----------------|-------|---------------------------------------------|---------------------------------------------------------------|----------------------------------------------|----------------|----------------------------------------------|-----------------|---------------------------------------------------|--|
| LuAdBrM-2  | 64/M | Adenocarcinoma | Brain | C3497T (A64V)                               |                                                               |                                              |                |                                              |                 |                                                   |  |
| LuAdBrM-3  | -    | Adenocarcinoma | Brain |                                             |                                                               | A10398G (T114A)                              |                | A11084G (T109A)                              |                 |                                                   |  |
| LuAdBrM-4  | -    | Adenocarcinoma | Brain |                                             | A4824G (T119A)                                                | T10363C (L102P)<br>(heteroplasmy or mixture) |                |                                              |                 |                                                   |  |
| LuAdBrM-5  | 79/M | Adenocarcinoma | Brain | T3394C (Y30H)<br>[T3394C (Y30H)]            | G4491A (V8I)                                                  | A10398G (T114A)                              |                | G11963A (V402I)                              |                 |                                                   |  |
| LuAdBrM-6  | -    | Adenocarcinoma | Brain | C3689G (A128G)<br>(heteroplasmy or mixture) |                                                               | T10084C (I9T)                                |                |                                              | A12358G (T8A)   |                                                   |  |
| LuAdBrM-7  | 49/M | Adenocarcinoma | Brain |                                             | T4612C (M48T)<br>A5127G (N220D)                               |                                              |                | G11969A (A404T)<br>C11151T (A131V)           | A13105G (I257V) |                                                   |  |
| LuAdBrM-8  | 70/M | Adenocarcinoma | Brain | T3394C (Y30H)<br>[T3394C (Y30H)]            | G4491A (V8I)                                                  | A10398G (T114A)                              |                | G11963A (V402I)                              |                 |                                                   |  |
| LuAdBrM-9  | -    | Adenocarcinoma | Brain | C3497T (A64V)                               |                                                               |                                              |                | A11930G (I391V)<br>(homoplasmy)              | A12361G (T9A)   |                                                   |  |
| LuAdBrM-10 | 51/M | Adenocarcinoma | Brain |                                             | C5178A (L237M)                                                | A10398G (T114A)                              |                |                                              | A14053G (T573A) |                                                   |  |
| LuAdBrM-11 | -    | Adenocarcinoma | Brain |                                             |                                                               | A10398G (T114A)                              |                |                                              | G13135A (A267T) | T14502C (I58V)<br>C14347T (V113M)<br>(homoplasmy) |  |
| LuAdBrM-12 | -    | Adenocarcinoma | Brain |                                             |                                                               | A10398G (T114A)                              |                |                                              |                 |                                                   |  |
| LuAdBrM-13 | 46/M | Adenocarcinoma | Brain | T3394C (Y30H)<br>[T3394C (Y30H)]            |                                                               | A10398G (T114A)                              |                |                                              |                 |                                                   |  |
| LuAdBrM-14 | -    | Adenocarcinoma | Brain |                                             |                                                               |                                              |                |                                              | A12358G (T8A)   |                                                   |  |
| LuAdBrM-15 | 50/M | Adenocarcinoma | Brain |                                             |                                                               | A10398G (T114A)                              |                | A11084G (T109A)                              | T13768C (F478L) |                                                   |  |
| LuAdBrM-16 | 69/M | Adenocarcinoma | Brain |                                             | C5178A (L237M)                                                | A10398G (T114A)                              |                |                                              |                 |                                                   |  |
| LuAdBrM-17 | 50/F | Adenocarcinoma | Brain |                                             |                                                               | A10398G (T114A)                              |                |                                              | A12361G (T9A)   |                                                   |  |
| LuAdBrM-18 | -    | Adenocarcinoma | Brain |                                             | A4824G (T119A)                                                |                                              |                | C11409T (P217L)<br>(heteroplasmy or mixture) |                 | A14193G (F161L)                                   |  |
| LuAdBrM-19 | 47/M | Adenocarcinoma | Brain |                                             |                                                               | A10398G (T114A)                              |                |                                              | A12361G (T9A)   |                                                   |  |
| LuAdBrM-20 | 70/M | Adenocarcinoma | Brain | G4048A (D248N)                              | G5460A (A331T)                                                | T10345C (I96T)<br>A10389G (T114A)            |                |                                              | T12811C (Y159H) |                                                   |  |
| LuAdBrM-22 | 72/M | Adenocarcinoma | Brain |                                             | C5178A (L237M)                                                | A10398G (T114A)                              |                |                                              |                 |                                                   |  |
| LuAdBrM-23 | -    | Adenocarcinoma | Brain |                                             | C5178A (L237M)                                                | A10398G (T114A)                              |                |                                              |                 |                                                   |  |
| LuAdBrM-24 | 68/F | Adenocarcinoma | Brain |                                             |                                                               | A10398G (T114A)                              |                | A11084G (T109A)                              |                 |                                                   |  |
| LuAdBrM-25 | 74/F | Adenocarcinoma | Brain |                                             | G4705A (M79T)<br>A4732G (N88S)                                |                                              | T10609C (M47T) | G12406A (V24I)<br>G13928C (S531T)            |                 |                                                   |  |
| LuPoBrM-1  | -    | Adenocarcinoma | Brain | C3497T (A64V)                               | A4704C (M79L)                                                 |                                              |                |                                              |                 |                                                   |  |
| LuPoBrM-2  | -    | Adenoarcinoma  | Brain | C3497T (A64V)                               |                                                               |                                              |                |                                              | T13879C (S515P) | G14162A (A171V)                                   |  |
| LuPoBrM-3  | -    | Adenoarcinoma  | Brain |                                             | A4824G (T119A)<br>T5361C (Y298H)<br>(heteroplasmy or mixture) |                                              |                |                                              |                 |                                                   |  |

|  |               |                                 |  |  |  |  |  |  |  |  |                                                   |
|--|---------------|---------------------------------|--|--|--|--|--|--|--|--|---------------------------------------------------|
|  |               |                                 |  |  |  |  |  |  |  |  | C14766T (T7I)<br>A15326G (T194A)                  |
|  |               | A8701G (T59A)                   |  |  |  |  |  |  |  |  | C14766T (T7I)<br>A15326G (T194A)                  |
|  |               | A8563G (T13A)<br>C8794T (H90Y)  |  |  |  |  |  |  |  |  | C14766T (T7I)<br>A15326G (T194A)                  |
|  |               | A8701G (T59A)                   |  |  |  |  |  |  |  |  | C14766T (T7I)<br>A15326G (T194A)                  |
|  |               |                                 |  |  |  |  |  |  |  |  | C14766T (T7I)<br>A15326G (T194A)                  |
|  |               | A8701G (T59A)                   |  |  |  |  |  |  |  |  | C14766T (T7I)<br>A15326G (T194A)                  |
|  |               |                                 |  |  |  |  |  |  |  |  | C14766T (T7I)<br>A15326G (T194A)                  |
|  |               | A8701G (T59A)                   |  |  |  |  |  |  |  |  | C14766T (T7I)<br>A15326G (T194A)                  |
|  |               |                                 |  |  |  |  |  |  |  |  | C14766T (T7I)<br>A15326G (T194A)                  |
|  |               | A8701G (T59A)                   |  |  |  |  |  |  |  |  | C14766T (T7I)<br>A15326G (T194A)                  |
|  |               |                                 |  |  |  |  |  |  |  |  | C14766T (T7I)<br>A15326G (T194A)                  |
|  |               | A8701G (T59A)                   |  |  |  |  |  |  |  |  | C14766T (T7I)<br>A15326G (T194A)                  |
|  |               |                                 |  |  |  |  |  |  |  |  | C14766T (T7I)<br>A15326G (T194A)                  |
|  |               | G8584A (A20T)                   |  |  |  |  |  |  |  |  | C14766T (T7I)<br>A15326G (T194A)                  |
|  |               |                                 |  |  |  |  |  |  |  |  | C14766T (T7I)<br>A15326G (T194A)                  |
|  |               | A8701G (T59A)                   |  |  |  |  |  |  |  |  | C14766T (T7I)<br>A15326G (T194A)                  |
|  |               |                                 |  |  |  |  |  |  |  |  | C14766T (T7I)<br>A15326G (T194A)                  |
|  |               | G8584A (A20T)                   |  |  |  |  |  |  |  |  | C14766T (T7I)<br>A15326G (T194A)                  |
|  |               | A8563G (T13A)<br>C8794T (H90Y)  |  |  |  |  |  |  |  |  | C14766T (T7I)<br>A15326G (T194A)                  |
|  |               | G8584A (A20T)<br>A8894T (N123I) |  |  |  |  |  |  |  |  | C14766T (T7I)<br>A14750G (T2A)<br>A15326G (T194A) |
|  | G7853A (V90I) | A8701G (T59A)                   |  |  |  |  |  |  |  |  | C14766T (T7I)<br>A15326G (T194A)                  |
|  |               | A8701G (T59A)                   |  |  |  |  |  |  |  |  | C14766T (T7I)<br>A15326G (T194A)                  |
|  |               | A8701G (T59A)<br>T8762C (I79T)  |  |  |  |  |  |  |  |  | C14766T (T7I)<br>A15326G (T194A)                  |
|  |               | A8701G (T59A)                   |  |  |  |  |  |  |  |  | C14766T (T7I)<br>A15326G (T194A)                  |
|  |               |                                 |  |  |  |  |  |  |  |  | C14766T (T7I)<br>A15326G (T194A)                  |
|  |               |                                 |  |  |  |  |  |  |  |  | C14766T (T7I)<br>A15326G (T194A)                  |
|  |               |                                 |  |  |  |  |  |  |  |  | C14766T (T7I)<br>A15326G (T194A)                  |
|  |               | C8794T (H90Y)                   |  |  |  |  |  |  |  |  | C14766T (T7I)<br>A15326G (T194A)                  |





Supplementary Table S2. Nonsynonymous SNPs and SNVs in the *ND* genes observed in NSCLC and colon cancer clinical samples.

Novel mutation

| SNP/Mutation | Amino acid substitution | Homoplasmy or heteroplasmy    | Frequency T (this study) (%) | Frequency C (mtSNP-Japan)*1 (%) | Frequency (T/C)*2 | Grantham value | Evolutionary conservation of the original amino acid | Conformational change | Reported disease association*3                                     | MutPred score*4 | No. of cases detected |                   |                                  |                    |
|--------------|-------------------------|-------------------------------|------------------------------|---------------------------------|-------------------|----------------|------------------------------------------------------|-----------------------|--------------------------------------------------------------------|-----------------|-----------------------|-------------------|----------------------------------|--------------------|
|              |                         |                               |                              |                                 |                   |                |                                                      |                       |                                                                    |                 | NSCLC                 |                   | Colon Cancer                     |                    |
|              |                         |                               |                              |                                 |                   |                |                                                      |                       |                                                                    |                 | Primary (N=45)        | Metastases (N=37) | Primary (N=22)                   | Metastases (N=11)  |
| <b>ND1</b>   |                         |                               |                              |                                 |                   |                |                                                      |                       |                                                                    |                 |                       |                   |                                  |                    |
| G3391A       | G29S                    | Homoplasmy                    | 1/115 (0.87%)                | 10/672 (1.49%)                  | 0.58              | 56             |                                                      |                       | LHON (putative)                                                    | 0.862           | 1                     | 0                 | 0                                | 0                  |
| T3394C       | Y30H                    | Homoplasmy                    | 5/115 (4.35%)                | 14/672 (2.08%)                  | 2.09              | 83             | Conserved                                            |                       | LHON / Diabetes / CPT deficiency / high altitude adaptation        | 0.783           | 1                     | 3                 | 1 w/ liver meta                  | 0                  |
| T3398C       | M31T                    | Homoplasmy                    | 1/115 (0.87%)                | 2/672 (0.30%)                   | 2.9               | 81             | Conserved                                            |                       | DMDF+HCM / GDM / possibly LVNC cardiomyopathy-associated           | 0.751           | 0                     | 0                 | 1                                | 0                  |
| C3497T       | A64V                    | Homoplasmy                    | 7/115 (6.09%)                | 20/672 (2.98%)                  | 2.04              | 64             |                                                      | Yes                   | LHON                                                               | 0.413           | 1                     | 5                 | 0                                | 1                  |
| C3689G       | A128G                   | Heteroplasmy or Heterogeneous | 2/115 (1.74%)                | 0                               | -                 | 60             |                                                      | Yes                   |                                                                    | 0.747           | 0                     | 1                 | 0                                | 1                  |
| G3709A       | A135T                   | Heteroplasmy or Heterogeneous | 1/115 (0.87%)                | 0                               | -                 | 58             | Conserved                                            | Yes                   |                                                                    | 0.774           | 1                     | 0                 | 0                                | 0                  |
| G3736A       | V144I                   | Homoplasmy                    | 2/115 (1.74%)                | 1/672 (0.15%)                   | 11.6              | 29             | Conserved                                            |                       | LHON                                                               | 0.661           | 0                     | 0                 | 1 w/ liver meta (matched case 1) | 1 (matched case 1) |
| G3955A       | A217T                   | Heteroplasmy or Heterogeneous | 1/115 (0.87%)                | 0                               | -                 | 58             |                                                      | Yes                   |                                                                    | 0.736           | 0                     | 0                 | 0                                | 1                  |
| G4048A       | D248N                   | Homoplasmy                    | 4/115 (3.48%)                | 32/672 (4.76%)                  | 0.73              | 23             |                                                      |                       |                                                                    | 0.37            | 2                     | 1                 | 1                                | 0                  |
| T4067C       | L254P                   | Heteroplasmy or Heterogeneous | 1/115 (0.87%)                | 0                               | -                 | 98             |                                                      |                       |                                                                    | 0.804           | 0                     | 0                 | 1                                | 0                  |
| T4216C       | Y304H                   | Homoplasmy                    | 1/115 (0.87%)                | 2/672 (0.30%)                   | 2.9               | 83             | (Haplogroup JT)                                      |                       | LHON / Insulin Resistance /possible adaptive high altitude variant | 0.611           | 1                     | 0                 | 0                                | 0                  |
| <b>ND2</b>   |                         |                               |                              |                                 |                   |                |                                                      |                       |                                                                    |                 |                       |                   |                                  |                    |
| G4491A       | V8I                     | Homoplasmy                    | 3/115 (2.61%)                | 11/672 (1.64%)                  | 1.59              | 29             |                                                      |                       |                                                                    | 0.439           | 1                     | 2                 | 0                                | 0                  |
| T4612C       | M48T                    | Homoplasmy                    | 1/115 (0.87%)                | 3/672 (0.45%)                   | 2.22              | 81             |                                                      |                       |                                                                    | 0.602           | 0                     | 1                 | 0                                | 0                  |
| A4704C       | M79L                    | Homoplasmy                    | 3/115 (2.61%)                | 1/672 (0.15%)                   | 17.4              | 15             |                                                      |                       |                                                                    | 0.686           | 2                     | 1                 | 0                                | 0                  |
| T4705C       | M79T                    | Homoplasmy                    | 9/115 (7.83%)                | 9/672 (1.34%)                   | 5.98              | 81             |                                                      |                       |                                                                    | 0.7             | 4                     | 2                 | 2 (1 w/ liver meta)              | 1                  |
| A4732G       | N88S                    | Homoplasmy                    | 6/115 (5.22%)                | 19/672 (2.83%)                  | 1.84              | 46             |                                                      |                       |                                                                    | 0.292           | 2                     | 1                 | 2                                | 1                  |
| A4824G       | T119A                   | Homoplasmy                    | 9/115 (7.83%)                | 50/672 (7.44%)                  | 1.05              | 58             | (Haplogroup A)                                       |                       |                                                                    | 0.368           | 4                     | 3                 | 2                                | 0                  |
| A4833G       | T122A                   | Homoplasmy                    | 3/115 (2.61%)                | 58/672 (8.63%)                  | 0.3               | 58             | (Haplogroup G)                                       |                       | Diabetes helper mutation/AD/PD                                     | 0.488           | 1                     | 0                 | 1                                | 1                  |
| A5127G       | N220D                   | Homoplasmy                    | 1/115 (0.87%)                | 3/672 (0.45%)                   | 1.93              | 23             |                                                      |                       |                                                                    | 0.528           | 0                     | 1                 | 0                                | 0                  |

|         |       |                                  |                 |                  |      |    |                  |  |                                                                                                          |       |                                 |    |                     |   |
|---------|-------|----------------------------------|-----------------|------------------|------|----|------------------|--|----------------------------------------------------------------------------------------------------------|-------|---------------------------------|----|---------------------|---|
| C5178A  | L237M | Homoplasmy                       | 7/115 (6.09%)   | 261/673 (38.84%) | 0.16 | 15 | (Haplogroup D)   |  | Longevity/Extraversion<br>MI /AMS protection/<br>blood iron metabolism                                   | 0.26  | 0                               | 5  | 0                   | 2 |
| A5301G  | I278V | Homoplasmy                       | 6/115 (5.22%)   | 29/672 (4.32%)   | 1.21 | 29 |                  |  |                                                                                                          | 0.311 | 3                               | 1  | 2                   | 0 |
| T5344C  | F292S | Heteroplasmy or<br>Heterogeneous | 1/115 (0.87%)   | 0                | -    | 22 | Conserved        |  |                                                                                                          | 0.59  | 1                               | 0  | 0                   | 0 |
| T5361C  | Y298H | Heteroplasmy or<br>Heterogeneous | 1/115 (0.87%)   | 0                | -    | 83 | Conserved        |  |                                                                                                          | 0.685 | 0                               | 1  | 0                   | 0 |
| T5418C  | F317L | Homoplasmy                       | 2/115 (1.74%)   | 0                | -    | 22 |                  |  |                                                                                                          | 0.612 | 0                               | 0  | 1 w/ liver meta     | 1 |
| T5442C  | F325L | Homoplasmy                       | 2/115 (1.74%)   | 4/672 (0.60%)    | 2.9  | 22 |                  |  |                                                                                                          | 0.437 | 0                               | 1  | 1                   | 0 |
| G5460A  | A331T | Homoplasmy                       | 5/115 (4.35%)   | 38/672 (5.65%)   | 0.77 | 58 |                  |  | PD/AD (controversial)                                                                                    | 0.505 | 3                               | 1  | 1                   | 0 |
| ND3     |       |                                  |                 |                  |      |    |                  |  |                                                                                                          |       |                                 |    |                     |   |
| T10084C | I9T   | Homoplasmy                       | 2/115 (1.74%)   | 11/672 (1.64%)   | 1.06 | 89 |                  |  |                                                                                                          | 0.414 | 0                               | 1  | 0                   | 1 |
| G10290A | A78T  | Heteroplasmy or<br>Heterogeneous | 1/115 (0.87%)   | 0                | -    | 58 |                  |  |                                                                                                          | 0.669 | 1                               | 0  | 0                   | 0 |
| T10345C | I96T  | Homoplasmy                       | 5/115 (4.35%)   | 29/672 (4.32%)   | 1    | 89 |                  |  |                                                                                                          | 0.398 | 3                               | 1  | 1                   | 0 |
| T10363C | L102P | Heteroplasmy or<br>Heterogeneous | 1/115 (0.87%)   | 0                | -    | 98 | Conserved        |  |                                                                                                          | 0.746 | 0                               | 1  | 0                   | 0 |
| A10398G | T114A | Homoplasmy                       | 67/115 (58.26%) | 478/672 (71.13%) | 0.82 | 58 | (Haplogroup IJK) |  | PD protective factor /<br>longevity / altered cell<br>pH / metabolic<br>syndrome / breast<br>cancer risk | 0.17  | 28                              | 20 | 13                  | 7 |
| ND4L    |       |                                  |                 |                  |      |    |                  |  |                                                                                                          |       |                                 |    |                     |   |
| T10609C | M47T  | Homoplasmy                       | 8/115 (6.96%)   | 35/672 (5.21%)   | 1.34 | 81 |                  |  |                                                                                                          | 0.481 | 2                               | 2  | 2 (1 w/ liver meta) | 2 |
| ND4     |       |                                  |                 |                  |      |    |                  |  |                                                                                                          |       |                                 |    |                     |   |
| G11016A | S86N  | Homoplasmy                       | 2/115 (1.74%)   | 19/672 (2.83%)   | 0.62 | 46 |                  |  |                                                                                                          | 0.303 | 1                               | 0  | 0                   | 1 |
| A11084G | T109A | Homoplasmy                       | 12/115 (10.43%) | 38/672 (5.65%)   | 1.85 | 58 |                  |  | AD/PD/MELAS<br>(controversial)                                                                           | 0.482 | 5 (1 w/ mediastinal<br>LN meta) | 4  | 2 w/ liver meta     | 1 |
| C11151T | A131V | Homoplasmy                       | 1/115 (0.90%)   | 5/672 (0.74%)    | 1.22 | 64 |                  |  |                                                                                                          | 0.577 | 0                               | 1  | 0                   | 0 |
| C11409T | P217L | Heteroplasmy or<br>Heterogeneous | 1/115 (0.90%)   | 0                | -    | 98 | Conserved        |  |                                                                                                          | 0.83  | 0                               | 1  | 0                   | 0 |
| A11510G | N251D | Heteroplasmy or<br>Heterogeneous | 1/115 (0.90%)   | 0                | -    | 23 |                  |  |                                                                                                          | 0.364 | 0                               | 0  | 1                   | 0 |
| G11696A | V313I | Homoplasmy                       | 3/115 (2.61%)   | 5/672 (0.74%)    | 3.53 | 29 |                  |  | LHON / LDYT / DEAF /<br>hypertension helper<br>mutation                                                  | 0.581 | 2                               | 0  | 1                   | 0 |
| A11930G | I391V | Homoplasmy                       | 2/115 (1.74%)   | 0                | -    | 29 |                  |  |                                                                                                          | 0.553 | 0                               | 2  | 0                   | 0 |
| G11963A | V402I | Homoplasmy                       | 3/115 (2.61%)   | 7/672 (1.04%)    | 2.51 | 29 |                  |  |                                                                                                          | 0.369 | 1                               | 2  | 0                   | 0 |
| G11969A | A404T | Homoplasmy                       | 1/115 (0.90%)   | 4/672 (0.60%)    | 1.5  | 58 |                  |  |                                                                                                          | 0.639 | 0                               | 1  | 0                   | 0 |



|          |          |                               |                |                |      |     |                |  |                                                  |       |   |   |                                     |                       |
|----------|----------|-------------------------------|----------------|----------------|------|-----|----------------|--|--------------------------------------------------|-------|---|---|-------------------------------------|-----------------------|
| A12026G  | I423V    | Homoplasmy                    | 1/115 (0.90%)  | 17/672 (2.53%) | 0.36 | 29  |                |  | DM                                               | 0.277 | 0 | 0 | 1                                   | 0                     |
| C12135T  | S459F    | Homoplasmy                    | 2/115 (1.74%)  | 1/672 (0.15%)  | 11.6 | 155 |                |  |                                                  | 0.319 | 0 | 0 | 1 w/ liver meta<br>(matched case 2) | 1<br>(matched case 2) |
| ND5      |          |                               |                |                |      |     |                |  |                                                  |       |   |   |                                     |                       |
| T12338C  | M1T      | Homoplasmy                    | 1/115 (0.90%)  | 2/672 (0.30%)  | 3    | 81  | Conserved      |  | DEAF1555 increased penetrance / LHON             | 0.966 | 0 | 0 | 1                                   | 0                     |
| A12358G  | T8A      | Homoplasmy                    | 7/115 (6.09%)  | 40/672 (5.95%) | 0.88 | 58  |                |  |                                                  | 0.265 | 4 | 2 | 0                                   | 1                     |
| A12361G  | T9A      | Homoplasmy                    | 5/115 (4.35%)  | 25/672 (3.72%) | 1.02 | 58  |                |  |                                                  | 0.249 | 2 | 3 | 0                                   | 0                     |
| G12406A  | V24I     | Homoplasmy                    | 9/115 (7.83%)  | 39/672 (5.80%) | 1.35 | 29  |                |  |                                                  | 0.251 | 2 | 3 | 2                                   | 2                     |
| G12454 A | V40I     | Homoplasmy                    | 1/115 (0.90%)  | 0              | -    | 29  |                |  |                                                  | 0.528 | 0 | 0 | 1 w/ liver meta                     | 0                     |
| G12503A  | C56Y     | Heteroplasmy or Heterogeneous | 1/115 (0.90%)  | 0              | -    | 194 |                |  |                                                  | 0.399 | 0 | 0 | 1                                   | 0                     |
| G12622A  | V96I     | Homoplasmy                    | 1/115 (0.90%)  | 1/672 (0.15%)  | 6    | 29  |                |  |                                                  | 0.403 | 1 | 0 | 0                                   | 0                     |
| T12811C  | Y159H    | Homoplasmy                    | 5/115 (4.35%)  | 29/672 (4.32%) | 1.01 | 83  |                |  | Possible LHON factor                             | 0.587 | 3 | 1 | 1                                   | 0                     |
| C12813A  | Y159STOP | Heteroplasmy or Heterogeneous | 1/115 (0.90%)  | 0              | -    | -   | Truncated      |  |                                                  | -     | 0 | 1 | 0                                   | 0                     |
| T12880C  | F182L    | Homoplasmy                    | 2/115 (1.74%)  | 22/672 (3.27%) | 0.53 | 22  |                |  |                                                  | 0.635 | 2 | 0 | 0                                   | 0                     |
| G13103A  | G256E    | Heteroplasmy or Heterogeneous | 1/115 (0.90%)  | 0              | -    | 98  | Conserved      |  |                                                  | 0.834 | 1 | 0 | 0                                   | 0                     |
| A13105G  | I257V    | Homoplasmy                    | 2/115 (1.74%)  | 7/672 (1.04%)  | 1.67 | 29  |                |  |                                                  | 0.35  | 1 | 1 | 0                                   | 0                     |
| G13135A  | A267T    | Homoplasmy                    | 1/115 (0.90%)  | 7/672 (1.04%)  | 0.87 | 58  |                |  |                                                  | 0.452 | 0 | 1 | 0                                   | 0                     |
| A13183G  | I283V    | Homoplasmy                    | 1/115 (0.90%)  | 18/672 (2.68%) | 0.34 | 29  |                |  |                                                  | 0.48  | 1 | 0 | 0                                   | 1                     |
| G13366A  | G344STOP | Heteroplasmy or Heterogeneous | 1/115 (0.90%)  | 0              | -    | -   | Truncated      |  |                                                  | -     | 0 | 0 | 1                                   | 0                     |
| G13477A  | A381T    | Homoplasmy                    | 1/115 (0.90%)  | 2/672 (0.30%)  | 3    | 58  |                |  |                                                  | 0.601 | 1 | 0 | 0                                   | 0                     |
| A13651C  | T439P    | Homoplasmy                    | 1/115 (0.90%)  | 11/672 (1.64%) | 0.55 | 38  |                |  |                                                  | -     | 1 | 1 | 0                                   | 0                     |
| G13708A  | A458T    | Homoplasmy                    | 2/115 (1.74%)  | 19/672 (2.83%) | 0.78 | 58  | (Haplogroup J) |  | LHON / Increased MS risk / higher freq in PD-ADS | 0.409 | 1 | 0 | 1                                   | 0                     |
| G13759A  | A475T    | Homoplasmy                    | 1/115 (0.90%)  | 15/672 (2.23%) | 0.4  | 58  |                |  |                                                  | 0.556 | 0 | 0 | 0                                   | 1                     |
| T13768C  | F478L    | Homoplasmy                    | 1/115 (0.90%)  | 3/672 (0.45%)  | 2    | 22  |                |  |                                                  | 0.572 | 0 | 1 | 0                                   | 0                     |
| T13879C  | S515P    | Homoplasmy                    | 1/115 (0.90%)  | 5/672 (0.74%)  | 1.22 | 74  |                |  |                                                  | 0.426 | 0 | 1 | 0                                   | 1                     |
| G13928C  | S531T    | Homoplasmy                    | 10/115 (8.70%) | 2/672 (0.30%)  | 29   | 58  | (Haplogroup F) |  |                                                  | 0.321 | 2 | 3 | 3                                   | 2                     |
| A13942G  | T536A    | Homoplasmy                    | 2/115 (1.74%)  | 2/672 (0.30%)  | 5.8  | 58  |                |  |                                                  | 0.438 | 0 | 0 | 1                                   | 1                     |
| C14003T  | T556I    | Homoplasmy                    | 1/115 (0.90%)  | 1/672 (0.15%)  | 6    | 89  |                |  |                                                  | 0.533 | 0 | 0 | 1                                   | 0                     |

|            |         |                               |               |               |      |    |           |           |                 |       |   |   |   |   |
|------------|---------|-------------------------------|---------------|---------------|------|----|-----------|-----------|-----------------|-------|---|---|---|---|
| A14053G    | T573A   | Homoplasmy                    | 1/115 (0.90%) | 4/672 (0.60%) | 1.5  | 58 |           |           |                 | 0.409 | 0 | 1 | 0 | 0 |
| A14062G    | I576V   | Homoplasmy                    | 1/115 (0.90%) | 0             | -    | 29 |           |           |                 | 0.421 | 0 | 0 | 1 | 0 |
| T14138C    | L601P   | Heteroplasmy or Heterogeneous | 1/115 (0.90%) | 0             | -    | 98 | Conserved |           |                 | 0.762 | 0 | 0 | 0 | 1 |
| <b>ND6</b> |         |                               |               |               |      |    |           |           |                 |       |   |   |   |   |
| G14162A    | A171V   | Homoplasmy                    | 2/115 (1.74%) | 4/672 (0.60%) | 2.9  | 64 |           |           |                 | 0.597 | 0 | 1 | 0 | 1 |
| A14193G    | F161L   | Homoplasmy                    | 1/115 (0.87%) | 0             | -    | 22 |           |           |                 | 0.653 | 0 | 1 | 0 | 0 |
| T14318C    | N119S   | Homoplasmy                    | 1/115 (0.87%) | 2/672 (0.30%) | 2.9  | 46 |           |           |                 | 0.437 | 0 | 1 | 0 | 0 |
| T14319C    | N119D   | Homoplasmy                    | 1/115 (0.87%) | 0             | -    | 23 |           |           | PD, early onset | 0.446 | 1 | 0 | 0 | 0 |
| C14347T    | V113M   | Homoplasmy                    | 1/115 (0.87%) | 0             | -    | 21 |           |           |                 | -     | 0 | 1 | 0 | 0 |
| T14502C    | I58V    | Homoplasmy                    | 2/115 (1.74%) | 5/672 (0.74%) | 2.35 | 29 | Conserved |           | LHON            | 0.385 | 1 | 1 | 0 | 0 |
| 14504delA  | L57STOP | Homoplasmy                    | 1/115 (0.87%) | 0             | -    | -  |           | Truncated |                 | -     | 0 | 0 | 1 | 0 |

**Novel mutation**

| SNP/Mutation | Amino acid substitution | Homoplasmy or heteroplasmy    | Frequency T (this study) (%) | Frequency C (mtSNP-Japan)*1 (%) | Frequency (T/C)*2 | Grantham value | Evolutionary conservation of the original amino acid | Conformational change | Reported disease association*3 | MutPred score*4 | No. of cases detected |                   |                 |                   |
|--------------|-------------------------|-------------------------------|------------------------------|---------------------------------|-------------------|----------------|------------------------------------------------------|-----------------------|--------------------------------|-----------------|-----------------------|-------------------|-----------------|-------------------|
|              |                         |                               |                              |                                 |                   |                |                                                      |                       |                                |                 | NSCLC                 |                   | Colon Ca        |                   |
|              |                         |                               |                              |                                 |                   |                |                                                      |                       |                                |                 | Primary (N=45)        | Metastases (N=37) | Primary (N=22)  | Metastases (N=11) |
| <b>COII</b>  |                         |                               |                              |                                 |                   |                |                                                      |                       |                                |                 |                       |                   |                 |                   |
| G7598A       | A5T                     | Homoplasmy                    | 1/115 (0.87%)                | 1/672 (0.15%)                   | 5.8               | 58             |                                                      |                       | Possible LHON helper variant   | 0.342           | 0                     | 1                 | 0               | 0                 |
| G7616A       | D11N                    | Homoplasmy                    | 1/115 (0.87%)                | 0                               | -                 | 23             | Conserved                                            |                       |                                | 0.532           | 0                     | 0                 | 1               | 0                 |
| G7664A       | A27T                    | Homoplasmy                    | 2/115 (1.74%)                | 6/672 (0.89%)                   | 1.96              | 58             |                                                      |                       |                                | 0.518           | 0                     | 1                 | 0               | 1                 |
| G7853A       | V90I                    | Homoplasmy                    | 2/115 (1.74%)                | 30/672 (4.46%)                  | 0.39              | 29             |                                                      |                       |                                | 0.249           | 2                     | 1                 | 0               | 0                 |
| G7859A       | D92N                    | Homoplasmy                    | 1/115 (0.87%)                | 2/672 (0.30%)                   | 2.9               | 23             |                                                      |                       | Progressive Encephalomyopathy  | 0.226           | 0                     | 1                 | 1               | 0                 |
| G8075A       | A164T                   | Homoplasmy                    | 1/115 (0.87%)                | 1/672 (0.15%)                   | 5.8               | 58             |                                                      |                       |                                | 0.74            | 1                     | 0                 | 0               | 0                 |
| T8223C       | L213S                   | Heteroplasmy or Heterogeneous | 1/115 (0.87%)                | 0                               | -                 | 145            |                                                      |                       |                                | 0.478           | 0                     | 0                 | 0               | 1                 |
| <b>ATP6</b>  |                         |                               |                              |                                 |                   |                |                                                      |                       |                                |                 |                       |                   |                 |                   |
| A8531G       | N2S                     | Homoplasmy                    | 1/115 (0.87%)                | 0                               | -                 | 46             |                                                      |                       |                                | 0.651           | 1                     | 0                 | 0               | 0                 |
| A8563G       | T13A                    | Homoplasmy                    | 5/115 (4.35%)                | 44/672 (6.55%)                  | 0.66              | 53             |                                                      |                       |                                | 0.405           | 2                     | 2                 | 1 w/ liver meta | 0                 |
| G8584A       | A20T                    | Homoplasmy                    | 5/115 (4.35%)                | 50/672 (7.44%)                  | 0.58              | 58             |                                                      |                       |                                | 0.553           | 1                     | 4                 | 0               | 0                 |
| T8602C       | F26L                    | Homoplasmy                    | 1/115 (0.87%)                | 0                               | -                 | 22             |                                                      |                       |                                | 0.614           | 1                     | 0                 | 0               | 0                 |
| A8701G       | T59A                    | Homoplasmy                    | 56/114 (49.12%)              | 425/672 (63.24%)                | 0.78              | 58             |                                                      |                       |                                | 0.14            | 29                    | 15                | 11              | 6                 |
| T8762C       | I79T                    | Homoplasmy                    | 2/115 (0.87%)                | 2/672 (0.30%)                   | 2.9               | 89             |                                                      |                       |                                | 0.687           | 1                     | 1                 | 0               | 0                 |

|             |       |                                  |                |                |      |     |           |  |                                                          |       |    |    |                     |    |
|-------------|-------|----------------------------------|----------------|----------------|------|-----|-----------|--|----------------------------------------------------------|-------|----|----|---------------------|----|
| C8794T      | H90Y  | Homoplasmy                       | 7/115 (6.09%)  | 48/672 (7.14%) | 0.85 | 83  |           |  | Exercise Endurance /<br>Coronary<br>Atherosclerosis risk | 0.608 | 1  | 3  | 2 (1 w/ liver meta) | 0  |
| A8894T      | N123I | Homoplasmy                       | 1/115 (0.87%)  | 4/672 (0.60%)  | 1.45 | 149 |           |  |                                                          | 0.417 | 0  | 1  | 0                   | 0  |
| G9053A      | S176N | Homoplasmy                       | 1/115 (0.87%)  | 16/672 (2.38%) | 0.37 | 46  |           |  |                                                          | 0.37  | 0  | 0  | 0                   | 1  |
| C9099A      | I191M | Homoplasmy                       | 1/115 (0.87%)  | 1/672 (0.15%)  | 5.8  | 10  |           |  |                                                          | 0.601 | 0  | 1  | 0                   | 0  |
| T9101G      | I192S | Homoplasmy                       | 1/115 (0.87%)  | 0              | -    | 142 |           |  | LHOH                                                     | 0.529 | 1  | 0  | 0                   | 0  |
| <b>CYTB</b> |       |                                  |                |                |      |     |           |  |                                                          |       |    |    |                     |    |
| A14750G     | T2A   | Homoplasmy                       | 1/115 (0.87%)  | 4/672 (0.6%)   | 1.45 | 58  |           |  |                                                          | 0.157 | 1  | 0  | 0                   | 0  |
| C14766T     | T7I   | Homoplasmy                       | 115/115 (100%) | 672/672 (100%) | 1    | 89  |           |  |                                                          | 0.165 | 45 | 37 | 22                  | 11 |
| T14798C     | F18L  | Homoplasmy                       | 1/115 (0.87%)  | 0              | -    | 22  |           |  |                                                          | 0.609 | 1  | 0  | 0                   | 0  |
| G14804A     | D20N  | Homoplasmy                       | 1/115 (0.87%)  | 0              | -    | 23  |           |  |                                                          | 0.716 | 1  | 0  | 0                   | 0  |
| A14870G     | I42V  | Homoplasmy                       | 1/115 (0.87%)  | 1/672 (0.15%)  | 5.8  | 29  |           |  |                                                          | 0.326 | 1  | 0  | 0                   | 0  |
| T14934C     | F63S  | Homoplasmy                       | 1/115 (0.87%)  | 0              | -    | 155 |           |  |                                                          | 0.725 | 0  | 0  | 1 w/ liver meta     | 0  |
| T14979C     | I78T  | Homoplasmy                       | 5/115 (4.35%)  | 42/672 (6.25%) | 0.7  | 89  |           |  |                                                          | 0.239 | 3  | 2  | 1                   | 1  |
| G14985A     | R80H  | Homoplasmy                       | 1/115 (0.87%)  | 0              | -    | 29  |           |  |                                                          | 0.833 | 1  | 0  | 0                   | 0  |
| T15071C     | Y109H | Homoplasmy                       | 2/115 (1.74%)  | 4/672 (0.6%)   | 2.9  | 83  |           |  |                                                          | 0.554 | 1  | 1  | 0                   |    |
| A15218G     | T158A | Homoplasmy                       | 2/115 (1.74%)  | 10/672 (1.49%) | 1.17 | 58  |           |  |                                                          | 0.366 | 1  | 0  | 1 w/ liver meta     | 0  |
| A15236G     | I164V | Homoplasmy                       | 3/115 (2.61%)  | 16/672 (2.38%) | 1.1  | 29  |           |  |                                                          | 0.224 | 1  | 1  | 0                   | 1  |
| G15254A     | V170M | Heteroplasmy or<br>Heterogeneous | 2/115 (1.74%)  | 0              | -    | 21  |           |  |                                                          | 0.719 | 0  | 0  | 1 w/ liver meta     | 1  |
| G15314A     | A190T | Homoplasmy                       | 1/115 (0.87%)  | 6/672 (0.89%)  | 0.98 | 58  |           |  |                                                          | 0.501 | 0  | 0  | 1                   | 0  |
| G15323A     | A193T | Homoplasmy                       | 1/115 (0.87%)  | 25/672 (3.72%) | 0.23 | 58  |           |  |                                                          | 0.517 | 0  | 0  | 1                   | 0  |
| A15326G     | T194A | Homoplasmy                       | 115/115 (100%) | 672/672 (100%) | 1    | 58  |           |  |                                                          | 0.452 | 45 | 37 | 22                  | 11 |
| A15363G     | N206S | Homoplasmy                       | 1/115 (0.87%)  | 0              | -    | 46  |           |  |                                                          | 0.383 | 0  | 0  | 0                   | 1  |
| G15497A     | G251S | Homoplasmy                       | 1/115 (0.87%)  | 25/672 (3.72%) | 0.23 | 56  | Conserved |  | EXIT / Obesity                                           | 0.477 | 0  | 0  | 1                   | 0  |
| A15860G     | I372V | Homoplasmy                       | 1/115 (0.87%)  | 22/672 (3.27%) | 0.27 | 29  |           |  |                                                          | 0.238 | 0  | 0  | 1                   | 0  |

**Somatic mutation** Novel mutations found in this study are shown in red.

\*1 The SNP frequency in persons with Parkinson's disease, Alzheimer's disease and type 2 diabetes w/ and w/o vascular lesion, men w/ and w/o juvenile obesity, and centenarians of Gifu and Tokyo in the database of GiiB-JST mTSN, the human mitochondrial genome SNP database (<http://mtnsp.>)

\*2 Calculated on the basis of the SNP frequency (C) in the database of GiiB-JST mTSN and the SNP frequency (T) in this study.

\*3 Data from MITOMAP database (<http://www.mitomap.org/MITOMAP>). PD: Parkinson's disease, AD: Alzheimer's disease, AMS: 4-Acetamido-4'-maleimidyl-distyrene-2,2'-disulphonic acid, DEAF: Maternally inherited DEAFness or aminoglycoside-induced DEAFness, DM: Type 2 diabetes mellitus, DMDF: Diabetes Mellitus + Deafness, EXIT: Exercise intolerance. HCM: Hypertrophic cardiomyopathy, LHON: Leber hereditary optic neuropathy, LDYT: Leber's hereditary optic neuropathy and DYSonia, MELAS: Mitochondrial Encephalomyopathy, Lactic Acidosis, and Stroke-like episodes, MS: Multiple sclerosis, NIDDM: Non-insulin-dependent diabetes mellitus,

\*4 Predicted pathogenicity score (Ref. 18). The amino acid variants showing more than 0.7 are considered as a high pathogenicity score group.



|          |      |                            |        |                                  |                                                                      |                                    |                |                                                                         |                                                       |                                   |
|----------|------|----------------------------|--------|----------------------------------|----------------------------------------------------------------------|------------------------------------|----------------|-------------------------------------------------------------------------|-------------------------------------------------------|-----------------------------------|
| LgCa-176 | 80/M | Squamous cell carcinoma    | T1N0M0 | C3970T (L222L)                   | C5049T (L194L)<br>G5147A (T226T)                                     | G10310A (L84L)                     |                | C10976T (L73L)<br>G11719A (G320G)                                       | C12633T (S99S)<br>C12882T (F182F)                     | G14476A (V66V)                    |
| LgCa-177 | 43/F | Squamous cell carcinoma    | T1N0M0 |                                  | A4769G (M100M)<br>C4883T (P138P)                                     | C10400T (T114T)                    |                | C11215T (Y152Y)<br>G11719A (G320G)                                      | C12705T (I123I)                                       | C14668T (M2M)                     |
| LgCa-178 | 58/M | Squamous cell carcinoma    | T1N1M0 | C3546T (T80T)<br>A4200T (L298L)  | A4769G (M100M)<br>C4883T (P138P)                                     | C10400T (T114T)                    |                | T10873C (P38P)<br>G11719A (G320G)<br>G11719A (G320G)                    | C12705T (I123I)                                       |                                   |
| LgCa-179 | 54/F | Adenocarcinoma             | T1N0M0 |                                  | A4769G (M100M)<br>C4883T (P138P)                                     | C10400T (T114T)                    |                | T10873C (P38P)<br>C11215T (Y152Y)                                       | C12705T (I123I)                                       | C14668T (M2M)                     |
| LgCa-180 | 68/M | Adenocarcinoma             | T2N1M0 | T4248C (I314I)                   | G4655A (T62T)<br>A4769G (M100M)                                      |                                    |                | G10801A (L14L)<br>C11536T (Y259Y)<br>C11647T (L296L)<br>G11719A (G320G) | C12705T (I123I)                                       | C14944T (I66I)                    |
| LgCa-181 | 64/M | Squamous cell carcinoma    | T1N2M0 |                                  | A4715G (G82G)<br>A4769G (M100M)                                      | C10400T (T114T)                    |                | T10873C (P38P)<br>C11215T (Y152Y)<br>G11719A (G320G)                    | C12705T (I123I)                                       | C14668T (M2M)                     |
| LgCa-182 | 46/M | Adenocarcinoma             | T1N2M0 |                                  | A4769G (M100M)<br>A4958G (M163M)                                     | C10400T (T114T)                    |                | T10873C (P38P)<br>T11017C (S86S)<br>G11719A (G320G)                     | C12705T (I123I)<br>G12771A (E145E)                    | G14364A (L104L)                   |
| LgCa-183 | 67/M | Squamous cell carcinoma    | T2N0M0 | T4117C (L271L)                   | A4769G (M100M)<br>G4820A (E117E)                                     |                                    |                | G11719A (G320G)                                                         | G13590A (L418L)                                       |                                   |
| LgCa-184 | 52/M | Pleomorphic carcinoma      | T3N0M0 |                                  | A4769G (M100M)<br>G5231A (L254L)<br>G5237A (P256P)<br>G5417A (Q316Q) |                                    |                | G11719A (G320G)                                                         | G12372A (L12L)<br>C12705T (I123I)                     | T15067C (F107F)                   |
| LgCa-187 | 73/M | Adenocarcinoma             | T1N0M0 | C3970T (L222L)                   | A4769G (M100M)<br>C5049T (L194L)<br>G5147A (T226T)                   | G10310A (L84L)                     |                | C10976T (L73L)<br>G11719A (G320G)                                       | C12633T (S99S)<br>C12882T (F182F)                     | G14476A (V66V)                    |
| LgCa-188 | 59/M | Squamous cell carcinoma    | T1N0M0 |                                  | A4769G (M100M)<br>C4883T (P138P)                                     | C10400T (T114T)                    |                | T10873C (P38P)<br>G11719A (G320G)                                       | C12705T (I123I)                                       | C14668T (M2M)                     |
| LgCa-189 | 73/M | Squamous cell carcinoma    | T1N1M0 | A3759G (L151L)                   | A4769G (M100M)<br>C4883T (P138P)<br>A5153G (L228L)                   | C10400T (T114T)                    |                | T10873C (P38P)<br>T11569C (I270I)<br>G11719A (G320G)                    | C12705T (I123I)                                       | T14319C (N119N)                   |
| LgCa-190 | 62/M | Adenocarcinoma             | T2N1M0 |                                  | A4769G (M100M)<br>G5147A (T226T)<br>G5417A (Q316Q)                   | T10235C (A59A)                     |                | T10882C (F41F)<br>G11719A (G320G)                                       | C12705T (I123I)                                       | A14233G (D147D)                   |
| LgCa-191 | 50/M | Adenocarcinoma             | T2N2M0 | C3846T (P180P)                   | A4769G (M100M)                                                       |                                    | C10607T (L46L) | G11719A (G320G)                                                         |                                                       |                                   |
| LgCa-192 | 54/F | Adenocarcinoma             | T4N0M0 | C3921T (S205S)<br>T4248C (I314I) | A4769G (M100M)                                                       |                                    |                | C11536T (Y259Y)<br>C11647T (L296L)<br>G11719A (G320G)                   | C12705T (I123I)                                       | G15172A (G142G)                   |
| LgCa-193 | 76/M | Squamous cell carcinoma    | T1N0M0 |                                  | A4769G (M100M)<br>C4883T (P138P)                                     |                                    |                | T10873C (P38P)<br>C11215T (Y152Y)<br>G11719A (G320G)                    | C12705T (I123I)                                       | C14668T (M2M)                     |
| LgCa-194 | 41/M | Adenocarcinoma             | T2N2M0 |                                  | A4769G (M100M)<br>C4883T (P138P)<br>A5153G (L228L)                   | G10397A (W113W)<br>C10400T (T114T) |                | T10873C (P38P)<br>G11719A (G320G)                                       | C12705T (I123I)<br>C13029T (P231P)<br>T13437C (P367P) |                                   |
| LgCa-195 | 66/M | Bronchioalveolar carcinoma | T1N0M0 |                                  | A4769G (M100M)<br>C4883T (P138P)                                     | C10400T (T114T)                    |                | T10873C (P38P)<br>C11215T (Y152Y)<br>G11719A (G320G)                    | C12705T (I123I)                                       | C14668T (M2M)                     |
| LgCa-196 | 64/M | Adenocarcinoma             | T1N0M0 |                                  | C4625T (S52S)<br>A4769G (M100M)                                      |                                    |                | G11719A (G320G)                                                         | C12853T (L173L)<br>T13437C (P367P)                    | G15346A (L200L)                   |
| LgCa-197 | 59/M | Bronchioalveolar carcinoma | T1N0M0 |                                  | A4769G (M100M)                                                       | C10400T (T114T)                    |                | T10873C (P38P)<br>G11719A (G320G)                                       | C12705T (I123I)                                       | T14308C (G122G)                   |
| LgCa-198 | 35/M | Squamous cell carcinoma    | T?N1M0 |                                  | A4769G (M100M)<br>A4958G (M163M)                                     | C10400T (T114T)                    |                | T10873C (P38P)<br>T11017C (S86S)<br>G11719A (G320G)<br>T11722C (L321L)  | C12705T (I123I)<br>G12771A (E145E)                    | G14364A (L104L)                   |
| LgCa-199 | 63/M | Adenocarcinoma             | T1N1M0 |                                  | A4769G (M100M)<br>G5231A (L254L)<br>G5417A (Q316Q)                   |                                    |                | G11719A (G320G)<br>A11731G (S324S)                                      | G12372A (L12L)<br>C12705T (I123I)                     | T14968C (N74N)<br>T15067C (F107F) |

|                |  |                |  |  |  |  |  |  |              |                                                                        |
|----------------|--|----------------|--|--|--|--|--|--|--------------|------------------------------------------------------------------------|
|                |  |                |  |  |  |  |  |  |              |                                                                        |
|                |  |                |  |  |  |  |  |  |              | T14783C (L13L)<br>G15043A (G99G)<br>G15301A (L185L)                    |
|                |  |                |  |  |  |  |  |  |              | T14783C (L13L)<br>G15043A (G99G)<br>G15301A (L185L)                    |
|                |  |                |  |  |  |  |  |  |              | T14783C (L13L)<br>G15043A (G99G)<br>G15301A (L185L)                    |
|                |  |                |  |  |  |  |  |  |              | C14944T (I66I)                                                         |
| A8188G (201G)  |  | T9090C (S188S) |  |  |  |  |  |  |              | T14783C (L13L)<br>G15043A (G99G)<br>T15184C (I146I)<br>G15301A (L185L) |
|                |  |                |  |  |  |  |  |  |              | T14783C (L13L)<br>G15043A (G99G)<br>G15301A (L185L)                    |
| G8206A (M207M) |  |                |  |  |  |  |  |  |              |                                                                        |
|                |  |                |  |  |  |  |  |  |              | T15067C (F107F)                                                        |
|                |  |                |  |  |  |  |  |  |              |                                                                        |
|                |  |                |  |  |  |  |  |  |              |                                                                        |
|                |  |                |  |  |  |  |  |  |              | T14783C (L13L)<br>G15043A (G99G)<br>G15301A (L185L)                    |
|                |  |                |  |  |  |  |  |  |              | T14783C (L13L)<br>G15043A (G99G)<br>G15301A (L185L)                    |
|                |  |                |  |  |  |  |  |  |              | A14893G (L49L)                                                         |
|                |  |                |  |  |  |  |  |  |              |                                                                        |
|                |  |                |  |  |  |  |  |  | G8790A (88L) | G15043A (G99G)                                                         |
|                |  |                |  |  |  |  |  |  |              | G15172A (G142G)                                                        |
|                |  |                |  |  |  |  |  |  |              | T14783C (L13L)<br>G15043A (G99G)<br>G15301A (L185L)                    |
|                |  |                |  |  |  |  |  |  |              | T14783C (L13L)<br>G15043A (G99G)<br>G15301A (L185L)                    |
|                |  |                |  |  |  |  |  |  |              | T14783C (L13L)<br>G15043A (G99G)<br>G15301A (L185L)                    |
|                |  |                |  |  |  |  |  |  |              | G15346A (L200L)                                                        |
|                |  |                |  |  |  |  |  |  |              | T14783C (L13L)<br>G15043A (G99G)<br>G15301A (L185L)                    |
|                |  |                |  |  |  |  |  |  |              | T14783C (L13L)<br>G15043A (G99G)<br>G15301A (L185L)                    |
|                |  |                |  |  |  |  |  |  |              | T14968C (N74N)<br>T15067C (F107F)                                      |

|          |      |                         |        |                                  |                                                    |                 |  |                                    |                                    |                                 |
|----------|------|-------------------------|--------|----------------------------------|----------------------------------------------------|-----------------|--|------------------------------------|------------------------------------|---------------------------------|
| LgCa-200 | 58/F | Adenocarcinoma          | T1N0M0 | C4071T (Y255Y)<br>A4164G (M286M) | A4769G (M100M)<br>A5351G (L294L)                   | C10400T (T114T) |  | T10873C (P38P)<br>G11719A (G320G)  | C12405T (L23L)<br>C12705T (I123I)  |                                 |
| LgCa-201 | 64/M | Adenocarcinoma          | T1N0M0 |                                  | A4769G (M100M)<br>A4895G (M163M)                   |                 |  | T11437C (A226A)<br>G11719A (G320G) |                                    |                                 |
| LgCa-202 | 76/M | Adenocarcinoma          | T1N0M0 |                                  | A4769G (M100M)<br>T4859C (L130L)<br>C4883T (P138P) | C10400T (T114T) |  | T10873C (P38P)<br>G11719A (G320G)  | C12705T (I123I)                    | T14635C (V13V)<br>C14668T (M2M) |
| LgCa-205 | 74/F | Squamous cell carcinoma | T1N1M0 |                                  | A4769G (M100M)<br>C4883T (P138P)                   | C10400T (T114T) |  | T10873C (P38P)<br>G11719A (G320G)  | C12705T (I123I)<br>T13656C (L440L) | C14668T (M2M)                   |

\*1 TNM (Tumour/Node/Metastasis) classification for staging of cancer.

#### NSCLC metastases (37 cases)

| Sample #   | Histology | Metastatic site | None  |                | Novel mutation                                     |                 |                |                                                                        |                                                                          |                                    |
|------------|-----------|-----------------|-------|----------------|----------------------------------------------------|-----------------|----------------|------------------------------------------------------------------------|--------------------------------------------------------------------------|------------------------------------|
|            |           |                 | ND1   | ND2            | ND3                                                | ND4L            | ND4            | ND5                                                                    | ND6                                                                      |                                    |
| LuAdBrM-1  | -         | Adenocarcinoma  | Brain |                | A4769G (M100M)<br>A4958G (M163M)                   | C10400T (T114T) | G10646A (V59V) | T10873C (P38P)<br>T11017C (S86S)<br>G11719A (G320G)                    | C12705T (I123I)<br>G12771A (E145E)                                       | G14364A (L104L)                    |
| LuAdBrM-2  | 64/M      | Adenocarcinoma  | Brain |                | A4769G (M100M)                                     | G10310A (L84L)  |                | G11719A (G320G)                                                        | A14133G (L599L)                                                          |                                    |
| LuAdBrM-3  | -         | Adenocarcinoma  | Brain |                | A4769G (M100M)<br>A4958G (M163M)<br>G4991A (Q174Q) | C10400T (T114T) |                | T10873C (P38P)<br>T11017C (S86S)<br>G11719A (G320G)<br>T11722C (L321L) | C12705T (I123I)<br>G12771A (E145E)                                       | G14364A (L104L)                    |
| LuAdBrM-4  | -         | Adenocarcinoma  | Brain |                | G4655A (T62T)<br>A4769G (M100M)                    |                 |                | C11536T (Y259Y)<br>C11647T (L296L)<br>G11719A (G320G)                  | C12705T (I123I)                                                          |                                    |
| LuAdBrM-5  | 79/M      | Adenocarcinoma  | Brain |                | A4769G (M100M)                                     | C10400T (T114T) |                | T10873C (P38P)<br>G11719A (G320G)                                      | C12705T (I123I)<br>T13015C (L227L)                                       | T14308C (G122G)                    |
| LuAdBrM-6  | -         | Adenocarcinoma  | Brain | G3483A (E59E)  | G5231A (L254L)<br>A4769G (M100M)<br>G5417A (Q316G) |                 |                | G11719A (G320G)                                                        | G12372A (L12L)<br>C12705T (I123I)<br>T13602C (Y422Y)                     | T15067C (F107F)<br>G15301A (L185L) |
| LuAdBrM-7  | 49/M      | Adenocarcinoma  | Brain |                | A4769G (M100M)                                     | A10403G (E115E) |                | G11719A (G320G)                                                        |                                                                          |                                    |
| LuAdBrM-8  | 70/M      | Adenocarcinoma  | Brain |                | A4769G (M100M)                                     | C10400T (T114T) |                | T10873C (P38P)<br>G11719A (G320G)                                      | C12705T (I123I)                                                          | T14308C (G122G)                    |
| LuAdBrM-9  | -         | Adenocarcinoma  | Brain |                | A4769G (M100M)<br>G5147A (T226T)                   | G10310A (L84L)  |                | G11719A (G320G)                                                        | T13962C (L542L)<br>A14133G (L599L)                                       |                                    |
| LuAdBrM-10 | 51/M      | Adenocarcinoma  | Brain |                | A4769G (M100M)<br>C4883T (P138P)                   | C10400T (T114T) |                | T10873C (P38P)<br>T11017C (S86S)<br>G11719A (G320G)                    | C12705T (I123I)                                                          | C14668T (M2M)                      |
| LuAdBrM-11 | -         | Adenocarcinoma  | Brain | G4140T (P278P) | A4769G (M100M)                                     | C10400T (T114T) |                | T10873C (P38P)<br>G11719A (G320G)                                      | C12549 T (T71T)<br>C12705T (I123I)<br>A13152G (L272L)                    |                                    |
| LuAdBrM-12 | -         | Adenocarcinoma  | Brain |                | A4769G (M100M)<br>A4895G (L130L)                   |                 |                | T11437C (A226A)<br>G11719A (G320G)                                     | T13641C (P435P)<br>A13887G (L517L)                                       |                                    |
| LuAdBrM-13 | 46/M      | Adenocarcinoma  | Brain |                | A4769G (M100M)<br>C4883T (P138P)                   | C10400T (T114T) |                | T10873C (P38P)<br>G11719A (G320G)                                      | C12705T (I123I)<br>A13104G (G256G)<br>T13641C (P435P)<br>A13887G (L517L) | C14668T (M2M)                      |
| LuAdBrM-14 | -         | Adenocarcinoma  | Brain |                | A4769G (M100M)<br>G5231A (L254L)<br>G5417A (Q316G) |                 |                | G11719A (G320G)                                                        | G12372A (L12L)<br>G12651A (L105L)<br>C12705T (I123I)                     | C14668T (M2M)                      |
| LuAdBrM-15 | 50/M      | Adenocarcinoma  | Brain |                | A4769G (M100M)<br>A4958G (M163M)                   | C10400T (T114T) |                | T10873C (P38P)<br>T11017C (S86S)<br>G11719A (G320G)<br>T11944C (L395L) | C12705T (I123I)<br>G12771A (E145E)                                       |                                    |
| LuAdBrM-16 | 69/M      | Adenocarcinoma  | Brain |                | A4769G (M100M)<br>C4883T (P138P)                   | C10400T (T114T) |                | T10873C (P38P)<br>G11719A (G320G)                                      | C12705T (I123I)<br>A13104G (G256G)                                       | G14364A (L104L)                    |
| LuAdBrM-17 | 50/F      | Adenocarcinoma  | Brain |                | A4769G (M100M)<br>A4895G (M142M)                   |                 |                | T11437C (A226A)<br>G11719A (G320G)                                     |                                                                          |                                    |

|               |                |                                                                        |
|---------------|----------------|------------------------------------------------------------------------|
| T7684C (L33L) |                | T14783C (L13L)<br>G15043A (G99G)<br>G15301A (L185L)                    |
|               | C8829T (N101N) | C15223T (D159D)                                                        |
|               |                | T14783C (L13L)<br>G15043A (G99G)<br>G15301A (L185L)                    |
|               |                | T14783C (L13L)<br>G15043A (G99G)<br>T15139C (Y131Y)<br>G15301A (L185L) |

| COII           | ATP6                            | CYTB                                                |
|----------------|---------------------------------|-----------------------------------------------------|
|                |                                 | T14783C (L13L)<br>G15043A (G99G)<br>G15301A (L185L) |
|                | C8844T (I106I)                  | G15346A (L200L)                                     |
|                |                                 | T14783C (L13L)<br>G15301A (L185L)                   |
|                |                                 | T14783C (L13L)<br>G15301A (L185L)                   |
|                |                                 | T15067C (F107F)<br>G15301A (L185L)                  |
|                |                                 |                                                     |
|                |                                 | T14783C (L13L)<br>G15043A (G99G)<br>G15301A (L185L) |
|                | G8856A (A110A)                  | G15346A (L200L)                                     |
|                |                                 | T14783C (L13L)<br>G15043A (G99G)<br>G15301A (L185L) |
| C7948T (Y121Y) | G8793C (P89P)<br>G8856A (A110A) | T14783C (L13L)<br>G15043A (G99G)<br>G15301A (L185L) |
|                | C8829T (N101N)                  | C15223T (D159D)                                     |
|                |                                 | T14783C (L13L)<br>G15043A (G99G)<br>G15301A (L185L) |
|                |                                 | T15067C (F107F)                                     |
| G7852A (E89E)  |                                 | T14783C (L13L)<br>G15043A (G99G)<br>G15301A (L185L) |
|                |                                 | T14783C (L13L)<br>G15043A (G99G)<br>G15301A (L185L) |
|                | C8829T (N101N)                  | C15223T (D159D)                                     |



Colon cancer primary tissue (22 cases)

| Case #    | Age/Sex | Histology      | TNM*1                     | None                                              | Novel mutation                                                       |                                    |                                  |                                                                         |                                                                          |                                   |
|-----------|---------|----------------|---------------------------|---------------------------------------------------|----------------------------------------------------------------------|------------------------------------|----------------------------------|-------------------------------------------------------------------------|--------------------------------------------------------------------------|-----------------------------------|
|           |         |                |                           | ND1                                               | ND2                                                                  | ND3                                | ND4L                             | ND4                                                                     | ND5                                                                      | ND6                               |
| ColoCa-1  | 69/M    | Adenocarcinoma | T3N1M1                    | T4248C (I314I)                                    | G4655A (T62T)<br>A4769G (M100M)                                      | G10325A (M89M)                     |                                  | T10873C (P38P)<br>C11536T (Y259Y)<br>C11647T (L296L)<br>G11719A (G320G) | C12705T (I123I)                                                          |                                   |
| ColoCa-2  | 65/M    | Adenocarcinoma | T3N2M0                    |                                                   | A4769G (M100M)<br>A4793G (M108M)<br>T5108C (T213T)                   | C10400T (T114T)                    |                                  | T10873C (P38P)<br>G11719A (G320G)<br>G11914A (T385T)                    | C12705T (I123I)                                                          | G14569A (S35S)                    |
| ColoCa-3  | 71/M    | Adenocarcinoma | T3N1M0                    |                                                   | A4769G (M100M)<br>C4883T (P138P)                                     | A10397G (W113W)<br>C10400T (T114T) |                                  | T10873C (P38P)<br>G11719A (G320G)<br>A11746G (L329L)<br>T11944C (L395L) | C12705T (I123I)<br>A13278G (M315M)                                       |                                   |
| ColoCa-4  | 50/M    | Adenocarcinoma | T4N4M0                    | C3970T (L222L)                                    | A4769G (M100M)<br>C5049T (L194L)<br>G5147A (Q316C)                   | G10310A (L84L)                     |                                  | C10976T (L73L)<br>G11719A (G320G)                                       | C12633T (S99S)<br>C12882T (F182F)                                        | G14476A (V66V)                    |
| ColoCa-5  | 67/M    | Adenocarcinoma | T4N4M0                    |                                                   | A4769G (M100M)<br>G5231A (L254L)<br>G5237A (P256P)<br>G5417A (Q316C) |                                    | T10724C (Y85Y)                   | G11719A (G320G)                                                         | G12372A (L12L)<br>C12705T (I123I)                                        |                                   |
| ColoCa-6  | 67/F    | Adenocarcinoma | P(T?N0M1)<br>(Liver meta) |                                                   | A4769G (M100M)<br>C4883T (P138P)                                     | C10400T (T114T)                    |                                  | T10873C (P38P)<br>C11215T (Y152Y)<br>G11719A (G320G)                    |                                                                          | C14668T (M2M)                     |
| ColoCa-7  | 52/F    | Adenocarcinoma | T4N2M1<br>(Liver meta)    |                                                   | A4769G (M100M)<br>C4883T (P138P)                                     |                                    |                                  | T10873C (P38P)<br>G11719A (G320G)                                       | C12705T (I123I)<br>A13104G (G256G)<br>T13641C (P435P)<br>A13887G (L517L) | C14668T (M2M)                     |
| ColoCa-8  | 61/M    | Adenocarcinoma | T3N0M0                    | C3408T (R34R)<br>T4248C (I314I)                   | A4769G (M100M)                                                       |                                    |                                  | G11719A (G320G)                                                         | C12705T (I123I)<br>C14067T (T577T)                                       |                                   |
| ColoCa-9  | 66/M    | Adenocarcinoma | T2N0M0                    | G4092A (K262K)                                    | A4769G (M100M)                                                       |                                    |                                  | T10873C (P38P)<br>G11719A (G320G)                                       | C12705T (I123I)                                                          |                                   |
| ColoCa-10 | 64/M    | Adenocarcinoma | T3N0M0                    |                                                   | A4769G (M100M)<br>C4883T (P138P)<br>A5153G (L228L)                   |                                    |                                  | T10873C (P38P)<br>C11422T (V221V)<br>G11719A (G320G)                    | C12705T (I123I)<br>A14013G (E559E)                                       | C14668T (M2M)                     |
| ColoCa-11 | 61/F    | Adenocarcinoma | T3N1M0                    |                                                   | A4769G (M100M)<br>C4883T (P138P)                                     |                                    |                                  | T10873C (P38P)<br>C11215T (Y152Y)<br>G11719A (G320G)                    |                                                                          | C14668T (M2M)                     |
| ColoCa-12 | 53/F    | Adenocarcinoma | T3N1M0                    | G3882A (E192E)<br>C4071T (Y255Y)                  | A4769G (M100M)<br>C4850T (G127G)                                     |                                    |                                  | T10873C (P38P)<br>G11719A (G320G)                                       | C12705T (I123I)                                                          |                                   |
| ColoCa-13 | 66/M    | Adenocarcinoma | T3N1M1<br>(Liver meta)    | G3970T (L222L)                                    | A4769G (M100M)<br>C5049T (L194L)<br>G5147A (T226T)                   | G10310A (L84L)                     |                                  | C10976T (L73L)<br>G11719A (G320G)                                       | C12633T (S99S)<br>C12882T (F182F)                                        | C14476A (V66V)                    |
| ColoCa-14 | 74/F    | Adenocarcinoma | T1N0M0                    | C3970T (L222L)                                    | A4769G (M100M)<br>G4820A (E117E)                                     |                                    |                                  | G11719A (G320G)                                                         |                                                                          | C14476A (V66V)                    |
| ColoCa-15 | 82/F    | Adenocarcinoma | T1N0M0                    | C3495T (P63P)<br>C4071T (Y255Y)<br>A4164G (M286M) | A4769G (M100M)<br>T5021C (I184I)<br>A5351G (L294L)                   | C10400T (T114T)                    |                                  | T10873C (P38P)<br>G11719A (G320G)                                       | C12405T (L23L)<br>C12705T (I123I)<br>G13707A (L457L)<br>C13782T (L482I)  |                                   |
| ColoCa-16 | 66/M    | Carcinoid      | T1N1M0                    |                                                   | A4769G (M100M)<br>C4883T (P138P)                                     | C10400T (T114T)                    |                                  | T10873C (P38P)<br>G11719A (G320G)                                       | C12705T (I123I)                                                          | C14668T (M2M)                     |
| ColoCa-17 | 75/F    | Adenocarcinoma | T1N0M0                    | C3970T (L222L)                                    | A4769G (M100M)                                                       |                                    | T10535C (Y22Y)<br>G10586A (S39S) | T10790C (L11L)<br>G11719A (G320G)                                       |                                                                          |                                   |
| ColoCa-18 | 54/F    | Adenocarcinoma | T4N1M1<br>(Liver meta)    |                                                   | A4769G (M100M)<br>A5496C (M163M)                                     | C10400T (T114T)                    |                                  | T10873C (P38P)<br>T11017C (S86S)<br>G11719A (G320G)                     | C12705T (I123I)<br>G12771A (E145E)                                       | G14364A (L104L)<br>T14470C (G68G) |
| ColoCa-19 | 56/M    | Adenocarcinoma | T3N0M0                    | G3531A (P75P)                                     | A4769G (M100M)<br>C4883T (P138P)                                     | C10400T (T114T)                    |                                  | T10873C (P38P)<br>G11719A (G320G)                                       | C12705T (I123I)<br>T12957C (N207N)                                       | C14668T (M2M)                     |

| COIL                            | ATP6           | CYTB                                                                   |
|---------------------------------|----------------|------------------------------------------------------------------------|
|                                 |                | T14783C (L13L)<br>G15043A (G99G)<br>G15301A (L185L)                    |
| C7867T (S94S)<br>T8200C (S205S) |                | T14783C (L13L)<br>G15043A (G99G)<br>G15301A (L185L)                    |
|                                 | A9180G (V218V) | T14783C (L13L)<br>G15043A (G99G)<br>G15301A (L185L)                    |
|                                 |                | T15067C (F107F)                                                        |
| T7783C (L67L)                   |                | T14783C (L13L)<br>G15043A (G99G)<br>G15301A (L185L)<br>A15874G (M376M) |
|                                 |                | T14783C (L13L)<br>G15043A (G99G)<br>G15301A (L185L)<br>C15518T (L258L) |
|                                 |                |                                                                        |
| C7747T (I55I)                   | A9180G (V218V) | T14783C (L13L)<br>G15043A (G99G)<br>G15301A (L185L)<br>A15724G (W326W) |
|                                 |                | T14783C (L13L)<br>G15043A (G99G)<br>G15301A (L185L)                    |
|                                 |                | T14783C (L13L)<br>G15043A (G99G)<br>G15301A (L185L)<br>A15874G (M376M) |
|                                 |                | T14783C (L13L)<br>G15043A (G99G)<br>G15301A (L185L)                    |
| Matched case 1                  |                |                                                                        |
|                                 |                |                                                                        |
| T7684C (L33L)                   |                | T14783C (L13L)<br>A15043G (G99G)<br>A15301G (L185L)                    |
| G8020A (P145P)                  | C8964T (T146T) | T14783C (L13L)<br>G15043A (G99G)<br>G15301A (L185L)                    |
| A7828G (L81L)                   |                |                                                                        |
|                                 |                | T14783C (L13L)<br>G15043A (G99G)<br>G15301A (L185L)                    |
|                                 |                | T14783C (L13L)<br>G15043A (G99G)<br>G15301A (L185L)                    |



|           |      |                |                        |  |                                                                      |                 |  |                                                     |                                    |                 |                |                |                                                     |
|-----------|------|----------------|------------------------|--|----------------------------------------------------------------------|-----------------|--|-----------------------------------------------------|------------------------------------|-----------------|----------------|----------------|-----------------------------------------------------|
| ColoCa-20 | 62/M | Adenocarcinoma | T1N0M0                 |  | A4769G (M100M)<br>G4820A (E117E)<br>G5231A (L254L)<br>G5417A (Q316Q) |                 |  | G11719A (G320G)                                     | C12705T (I123I)<br>G12372A (L12L)  |                 |                |                |                                                     |
| ColoCa-21 | 63/M | Adenocarcinoma | T?N?M1<br>(Liver meta) |  | A4769G (M100M)<br>A4958G (M163M)                                     | C10400T (T114T) |  | T10873C (P38P)<br>T11017C (S86S)<br>G11719A (G320G) | C12705T (I123I)<br>G12771A (E145E) | G14364A (L104L) |                |                | T14783C (L13L)<br>G15043A (G99G)<br>G15301A (L185L) |
| ColoCa-22 | 67/M | Adenocarcinoma | T4N1M1<br>(Liver meta) |  | A4769G (M100M)<br>A5084G (L205L)                                     | C10400T (T114T) |  | G11719A (G320G)<br>G11914A (T385T)                  |                                    |                 | Matched case 2 | A9120G (L198L) | C15535T (N263N)                                     |

\*1 TNM (Tumour/Node/Metastasis) classification for staging of cancer.

Colon cancer metastases (11 cases)

| Cae #                   | Age/Sex | Histology      | Metastasis site | None           |                                                    | Novel mutation                    |                |     |                                                     |                                                      |                                   |                |
|-------------------------|---------|----------------|-----------------|----------------|----------------------------------------------------|-----------------------------------|----------------|-----|-----------------------------------------------------|------------------------------------------------------|-----------------------------------|----------------|
|                         |         |                |                 | ND1            | ND2                                                | ND3                               | ND4L           | ND4 | ND5                                                 | ND6                                                  |                                   |                |
| CoAdBrM-1               | -       | Adenocarcinoma | Brain           |                |                                                    | C10400T (T114T)                   |                |     | G11719A (G320G)                                     | C12882T (F182F)                                      |                                   |                |
| ColonLivM-1             | -       | -              | Liver           |                | A4958G (M163M)                                     | C10400T (T114T)                   |                |     | T10873C (P38P)<br>T11017C (S86S)<br>G11719A (G320G) |                                                      | G14364A (L104L)                   |                |
| ColonLivM-2             | -       | -              | Liver           |                | C4883T (P138P)                                     | C10104T (L16L)<br>C10400T (T114T) |                |     | T10873C (P38P)<br>G11719A (G320G)                   | C12705T (I123I)                                      | T14287C (G129G)<br>C14668T (M2M)  |                |
| ColonLivM-3             | -       | -              | Liver           |                | C4883T (P138P)                                     | C10400T (T114T)                   |                |     | T10873C (P38P)<br>G11719A (G320G)                   | C12705T (I123I)<br>T12957C (N207N)                   | C14668T (M2M)                     |                |
| ColonLivM-4             | -       | -              | Liver           |                | G5147A (T226T)<br>G5417A (Q316Q)                   |                                   | C10607T (L46L) |     | T11465C (L236L)<br>G11719A (G320G)                  | G12501A (M55M)<br>C12705T (I123I)<br>T13899C (Y562Y) |                                   | A14893G (L49L) |
| ColonLivM-5             | -       | -              | Liver           |                | T5108G (T29T)                                      | C10400T (T114T)                   |                |     | T10873C (P38P)<br>G11719A (G320G)                   | C12705T (I123I)<br>A13563G (L409L)                   | T14200C (W158W)<br>G14569A (S35S) |                |
| ColonLivM-6             | -       | -              | Liver           |                | T4742C (N91N)                                      |                                   |                |     | G11719A (G320G)                                     |                                                      |                                   |                |
| ColoLivM-8              | 67/M    | Adenocarcinoma | Liver           |                | A4769G (M100M)<br>A5084G (L205L)                   | C10400T (T114T)                   |                |     | G11719A (G320G)<br>G11914A (T385T)                  |                                                      |                                   | Matched case 2 |
| ColoCa-13LivM           | 66/M    | Adenocarcinoma | Liver           | G3970T (L222L) | A4769G (M100M)<br>C5049T (L194L)<br>G5147A (T226T) | G10310A (L84L)                    |                |     | C10976T (L73L)<br>G11719A (G320G)                   | C12633T (S99S)<br>C12882T (F182F)                    | C14476A (V66V)                    | Matched case 1 |
| ColonLuM-1              | 80/M    | -              | Lung            |                |                                                    | C10181T (F41F)<br>C10400T (T114T) |                |     | T10873C (P38P)<br>T11215T (Y152Y)                   |                                                      | T14635C (V13V)<br>C14668T (M2M)   |                |
| ColonLuM-2<br>(LgCa203) | 71/F    | Adenocarcinoma | Lung            |                |                                                    | C10400T (T114T)                   |                |     | T10873C (P38P)<br>G11719A (G320G)                   |                                                      | T14308C (G122G)                   |                |

| COI1                             | ATP6           | CYTB                                                                   |
|----------------------------------|----------------|------------------------------------------------------------------------|
|                                  |                | T14783C (L13L)<br>G15043A (G99G)<br>G15301A (L185L)                    |
| G8020A (P145P)<br>G8251A (G222G) | C8964T (T146T) | T14783C (L13L)<br>G15043A (G99G)<br>G15301A (L185L)                    |
|                                  |                | T14783C (L13L)<br>G15043A (G99G)<br>A15301A (L185L)                    |
|                                  |                | A14893G (L49L)                                                         |
| G7600A (A5A)                     |                | T14783C (L13L)<br>G15043A (G99G)<br>G15301A (L185L)                    |
| C7909T (Y108Y)                   |                | G15346A (L200L)<br>C15391T (S215S)                                     |
|                                  | A9120G (L198L) | C15535T (N263N)                                                        |
| G7672A (M19M)<br>G8206A (M207M)  |                |                                                                        |
| G8206A (M207M)                   |                |                                                                        |
| G8020A (P145P)                   |                | T14783C (L13L)<br>G15043A (G99G)<br>G15301A (L185L)<br>A15874G (M376M) |

Supplementary Table S4. Properties of synonymous SNPs and SNVs in *ND* genes in NSCLC and colon cancer clinical samples.

Novel mutation

| SNP/Mutation | Amino acid | Frequency T (this study) (%) | Frequency C (mtSNP-Japan)*1 (%) | Frequency (T/C) | No. of cases detected |                   |                |                   |
|--------------|------------|------------------------------|---------------------------------|-----------------|-----------------------|-------------------|----------------|-------------------|
|              |            |                              |                                 |                 | NSCLC                 |                   | Colon Cancer   |                   |
|              |            |                              |                                 |                 | Primary (N=45)        | Metastases (N=37) | Primary (N=22) | Metastases (N=11) |
| <b>ND1</b>   |            |                              |                                 |                 |                       |                   |                |                   |
| C3408T       | R34R       | 1/115 (0.87%)                | 0                               | -               | 0                     | 0                 | 1              | 0                 |
| G3483A       | E59E       | 1/115 (0.87%)                | 0                               | -               | 0                     | 1                 | 0              | 0                 |
| C3495T       | P63P       | 1/115 (0.87%)                | 0                               | -               | 0                     | 0                 | 1              | 0                 |
| G3531A       | P75P       | 2/115 (1.74%)                | 3/672 (0.45%)                   | 3.87            | 1                     | 0                 | 1              | 0                 |
| C3546T       | T80T       | 1/115 (0.87%)                | 2/672 (0.30%)                   | 2.9             | 1                     | 0                 | 0              | 0                 |
| T3552A       | A82A       | 1/115 (0.87%)                | 1/672 (0.15%)                   | 5.8             | 0                     | 1                 | 0              | 0                 |
| A3759G       | L151L      | 1/115 (0.87%)                | 5/672 (0.74%)                   | 1.18            | 1                     | 0                 | 0              | 0                 |
| T3826C       | L174L      | 1/115 (0.87%)                | 1/672 (0.15%)                   | 5.8             | 0                     | 1                 | 0              | 0                 |
| C3846T       | P180P      | 1/115 (0.87%)                | 0                               | -               | 1                     | 0                 | 0              | 0                 |
| G3882A       | E192E      | 2/115 (1.74%)                | 4/672 (0.60%)                   | 2.9             | 0                     | 1                 | 1              | 0                 |
| C3921T       | S205S      | 2/115 (1.74%)                | 0                               | -               | 2                     | 0                 | 0              | 0                 |
| C3970T       | L222L      | 8/115 (6.96%)                | 40/672 (5.95%)                  | 1.17            | 2                     | 3                 | 3 (1 w/ meta)  | 0                 |
| C4071T       | Y255Y      | 7/115 (6.09%)                | 34/672 (5.06%)                  | 1.2             | 3                     | 2                 | 2              | 0                 |
| T4117C       | L271L      | 4/115 (3.48%)                | 15/672 (2.23%)                  | 1.56            | 1                     | 1                 | 0              | 2                 |
| G4140T       | P278P      | 2/115 (1.74%)                | 4/672 (0.60%)                   | 2.9             | 1                     | 1                 | 0              | 0                 |
| A4164G       | M286M      | 5/115 (4.35%)                | 30/672 (4.46%)                  | 0.98            | 3                     | 1                 | 1              | 0                 |
| A4200T       | L298L      | 1/115 (0.87%)                | 2/672 (0.30%)                   | 2.9             | 1                     | 0                 | 0              | 0                 |
| T4248C       | I314I      | 7/115 (6.09%)                | 50/672 (7.44%)                  | 0.82            | 3                     | 2                 | 2 (1 w/ meta)  | 0                 |
| <b>ND2</b>   |            |                              |                                 |                 |                       |                   |                |                   |
| C4505T       | T12T       | 1/115 (0.87%)                | 9/672 (1.34%)                   | 0.65            | 1                     | 0                 | 0              | 0                 |
| C4625T       | S52S       | 2/115 (1.74%)                | 1/672 (0.15%)                   | 11.6            | 1                     | 1                 | 0              | 0                 |
| G4655A       | T62T       | 4/115 (3.48%)                | 39/672 (5.80%)                  | 0.6             | 1                     | 2                 | 1 w/ meta      | 0                 |
| A4715G       | G82G       | 2/115 (1.74%)                | 20/672 (2.98%)                  | 0.34            | 1                     | 1                 | 0              | 0                 |
| T4742C       | N91N       | 3/115 (2.61%)                | 4/672 (0.60%)                   | 4.35            | 0                     | 2                 | 0              | 1                 |
| A4769G       | M100M      | 115/115 (100%)               | 672/672 (100.00%)               | 1               | 45                    | 37                | 22 (7 w/ meta) | 11                |
| A4793G       | M108M      | 1/115 (0.87%)                | 22/672 (3.27%)                  | 0.27            | 0                     | 0                 | 1              | 0                 |
| G4820A       | E117E      | 6/115 (5.22%)                | 20/672 (2.98%)                  | 1.75            | 2                     | 1                 | 2              | 1                 |
| C4850T       | G127G      | 2/115 (1.74%)                | 4/672 (0.60%)                   | 2.9             | 0                     | 1                 | 1              | 0                 |
| T4856C       | L129L      | 1/115 (0.87%)                | 0                               | -               | 0                     | 1                 | 0              | 0                 |
| T4859C       | L130L      | 2/115 (1.74%)                | 12/672 (1.79%)                  | 0.97            | 1                     | 1                 | 0              | 0                 |
| C4883T       | P138P      | 35/115 (30.43%)              | 260/672 (38.69%)                | 0.79            | 17                    | 9                 | 7 (2 w/ meta)  | 2                 |
| A4895G       | M142M      | 3/115 (2.61%)                | 13/672 (1.93%)                  | 0.9             | 1                     | 2                 | 0              | 0                 |
| A4958G       | M163M      | 11/115 (9.57%)               | 46/672 (6.85%)                  | 1.4             | 5                     | 4                 | 1 w/ meta      | 1                 |
| G4991A       | Q174Q      | 1/115 (0.87%)                | 1/672 (0.15%)                   | 5.8             | 0                     | 1                 | 0              | 0                 |
| T5021C       | I184I      | 2/115 (1.74%)                | 2/672 (0.30%)                   | 5.8             | 1                     | 0                 | 1              | 0                 |
| C5049T       | L194L      | 7/115 (6.09%)                | 15/672 (2.23%)                  | 2.73            | 2                     | 2                 | 2 (1 w/ meta)  | 1                 |
| T5108C       | T213T      | 3/115 (2.61%)                | 63/672 (9.38%)                  | 0.28            | 1                     | 0                 | 1              | 1                 |
| G5147A       | T226T      | 10/115 (8.70%)               | 41/672 (6.10%)                  | 1.43            | 3                     | 4                 | 2 (1 w/ meta)  | 1                 |
| A5153G       | L228L      | 4/115 (3.48%)                | 10/672 (1.49%)                  | 2.34            | 2                     | 1                 | 1              | 0                 |
| G5231A       | L254L      | 7/115 (6.09%)                | 38/672 (5.65%)                  | 1.08            | 3                     | 2                 | 2              | 0                 |
| G5237A       | P256P      | 2/115 (1.74%)                | 4/672 (0.60%)                   | 2.92            | 1                     | 0                 | 1              | 0                 |
| G5261A       | W264W      | 1/115 (0.87%)                | 4/672 (0.60%)                   | 1.45            | 1                     | 0                 | 0              | 0                 |
| T5291C       | N274N      | 1/115 (0.87%)                | 0                               | -               | 1                     | 0                 | 0              | 0                 |
| A5351G       | L294L      | 5/115 (4.35%)                | 30/672 (4.46%)                  | 0.98            | 3                     | 1                 | 1              | 0                 |

|             |       |                  |                  |      |    |    |                |   |
|-------------|-------|------------------|------------------|------|----|----|----------------|---|
| G5417A      | Q316Q | 10/115 (8.70%)   | 55/672 ( 8.18%)  | 1.06 | 5  | 2  | 2              | 1 |
| <b>ND3</b>  |       |                  |                  |      |    |    |                |   |
| C10104T     | L16L  | 1/115 (0.87%)    | 14/672 ( 2.08%)  | 0.42 | 0  | 0  | 0              | 1 |
| C10181T     | F41F  | 1/115 (0.87%)    | 18/672 ( 2.68%)  | 0.32 | 0  | 0  | 0              | 1 |
| T10235C     | A59A  | 1/115 (0.87%)    | 2/672 ( 0.30%)   | 2.9  | 1  | 0  | 0              | 0 |
| T10238C     | I60I  | 1/115 (0.87%)    | 12/672 ( 1.79%)  | 0.49 | 1  | 0  | 0              | 0 |
| G10310A     | L84L  | 9/115 (7.83%)    | 50/672 ( 7.44%)  | 1.05 | 2  | 5  | 2 (1 w/ meta)  | 0 |
| G10325A     | M89M  | 1/115 (0.87%)    | 1/672 ( 0.15%)   | 5.8  | 0  | 0  | 1 w/ meta      | 0 |
| A10397G     | W113W | 2/115 (1.74%)    | 29/672 ( 4.32%)  | 0.4  | 1  | 0  | 1              | 0 |
| C10400T     | T114T | 54/115 (46.96%)  | 441/672 (65.62%) | 0.72 | 21 | 18 | 8              | 7 |
| A10403G     | E115E | 1/115 (0.87%)    | 1/672 ( 0.15%)   | 5.8  | 0  | 1  | 0              | 0 |
| <b>ND4L</b> |       |                  |                  |      |    |    |                |   |
| T10535C     | Y22Y  | 1/115 (0.87%)    | 2/672 ( 0.30%)   | 2.9  | 0  | 0  | 1              | 0 |
| G10586A     | S39S  | 1/115 (0.87%)    | 2/672 ( 0.30%)   | 2.9  | 0  | 0  | 1              | 0 |
| C10607T     | L46L  | 2/115 (1.74%)    | 18/672 ( 2.68%)  | 0.65 | 1  | 0  | 0              | 1 |
| G10646A     | V59V  | 2/115 (1.74%)    | 6/672 ( 0.89%)   | 1.96 | 1  | 1  | 0              | 0 |
| T10724C     | Y85Y  | 1/115 (0.87%)    | 0                | -    | 0  | 0  | 1              | 0 |
| <b>ND4</b>  |       |                  |                  |      |    |    |                |   |
| T10790C     | L11L  | 1/115 (0.87%)    | 4/672 ( 0.60%)   | 1.45 | 0  | 0  | 1              | 0 |
| G10801A     | L14L  | 2/115 (1.74%)    | 4/672 ( 0.60%)   | 2.9  | 2  | 0  | 0              | 0 |
| T10873C     | P38P  | 66/115 (57.39%)  | 440/672 (65.48%) | 0.88 | 28 | 18 | 14 (5 w/ meta) | 6 |
| T10882C     | F41F  | 1/115 (0.87%)    | 0                | -    | 1  | 0  | 0              | 0 |
| C10976T     | L73L  | 6/115 (5.22%)    | 19/672 ( 2.83%)  | 1.84 | 2  | 1  | 2 (1 w/ meta)  | 1 |
| A11017C     | S86S  | 13/115 (11.30%)  | 38/672 ( 5.65%)  | 2    | 5  | 7  | 1              | 0 |
| A11023G     | P88P  | 1/115 (0.87%)    | 0                | -    | 1  | 0  | 0              | 0 |
| C11215T     | Y152Y | 9/115 (7.83%)    | 31/672 ( 4.61%)  | 1.7  | 6  | 0  | 2 (1 w/ meta)  | 1 |
| A11239G     | L160L | 1/115 (0.87%)    | 0                | -    | 1  | 0  | 0              | 0 |
| T11260C     | T167T | 1/115 (0.87%)    | 0                | -    | 1  | 0  | 0              | 0 |
| C11389T     | Y210Y | 1/115 (0.87%)    | 1/672 ( 0.15%)   | 5.8  | 0  | 1  | 0              | 0 |
| C11422T     | V221V | 1/115 (0.87%)    | 1/672 ( 0.15%)   | 5.8  | 0  | 0  | 1              | 0 |
| T11437C     | A226A | 3/115 (2.61%)    | 5/672 ( 0.74%)   | 3.53 | 1  | 2  | 0              | 0 |
| T11465C     | L236L | 1/115 (0.87%)    | 0                | -    | 0  | 0  | 0              | 1 |
| C11536T     | Y259Y | 7/115 (6.09%)    | 43/672 ( 6.40%)  | 0.95 | 4  | 2  | 1 w/ meta      | 0 |
| T11569C     | I270I | 1/115 (0.87%)    | 1/672 ( 0.15%)   | 5.8  | 1  | 0  | 0              | 0 |
| C11647T     | L296L | 6/115 (5.22%)    | 39/672 ( 5.80%)  | 0.9  | 3  | 2  | 1 w/ meta      | 0 |
| C11665T     | L302L | 1/115 (0.87%)    | 4/672 ( 0.60%)   | 1.45 | 0  | 1  | 0              | 0 |
| G11719A     | G320G | 111/115 (96.52%) | 671/672 (99.85%) | 0.97 | 44 | 36 | 22 (7 w/ meta) | 9 |
| T11722C     | L321L | 2/115 (1.74%)    | 6/672 ( 0.89%)   | 1.96 | 1  | 1  | 0              | 0 |
| A11731G     | S324S | 1/115 (0.87%)    | 0                | -    | 1  | 0  | 0              | 0 |
| A11746G     | L329L | 1/115 (0.87%)    | 1/672 ( 0.15%)   | 5.8  | 0  | 0  | 1              | 0 |
| G11914A     | T385T | 4/115 (3.48%)    | 37/672 ( 5.51%)  | 0.63 | 0  | 2  | 2 (1 w/ meta)  | 0 |
| T11944C     | L395L | 2/115 (1.74%)    | 17/672 ( 2.53%)  | 0.69 | 0  | 1  | 1              | 0 |
| G12007A     | W416W | 1/115 (0.87%)    | 4/672 ( 0.60%)   | 1.45 | 1  | 0  | 0              | 0 |
| C12088T     | P443P | 2/115 (1.74%)    | 2/672 ( 0.30%)   | 5.8  | 1  | 1  | 0              | 0 |
| T12091T     | I444I | 1/115 (0.87%)    | 4/672 ( 0.60%)   | 1.45 | 0  | 1  | 0              | 0 |
| <b>ND5</b>  |       |                  |                  |      |    |    |                |   |
| A12358G     | T8T   | 1/115 (0.87%)    | 0                | -    | 1  | 0  | 0              | 0 |
| G12372A     | L12L  | 8/115 (6.96%)    | 38/672 (5.65%)   | 1.23 | 4  | 2  | 2              | 0 |
| C12405T     | L23L  | 5/115 (4.35%)    | 29/672 (4.32%)   | 1.01 | 3  | 1  | 1              | 0 |
| G12501A     | M55M  | 1/115 (0.87%)    | 10/672 ( 1.49%)  | 0.58 | 0  | 0  | 0              | 1 |
| C12549T     | T71T  | 2/115 (1.74%)    | 4/672 (0.60%)    | 2.9  | 1  | 1  | 0              | 0 |

|            |       |                 |                  |      |    |    |                |   |
|------------|-------|-----------------|------------------|------|----|----|----------------|---|
| C12633T    | S99S  | 7/115 (6.09%)   | 18/672 (2.68%)   | 2.13 | 2  | 2  | 2 (1 w/ meta)  | 1 |
| G12651C    | L105L | 3/115 (2.61%)   | 2/672 (0.30%)    | 8.7  | 1  | 2  | 0              | 0 |
| C12705T    | I123I | 81/115 (70.43%) | 545/672 (81.10%) | 0.87 | 38 | 23 | 15 (4 w/ meta) | 5 |
| T12714C    | I126I | 1/115 (0.87%)   | 0                | -    | 0  | 1  | 0              | 0 |
| G12771A    | E145E | 11/115 (9.57%)  | 47/672 (6.99%)   | 1.37 | 5  | 4  | 2 (1 w/ meta)  | 0 |
| C12853T    | L173L | 2/115 (1.74%)   | 1/672 (0.15%)    | 11.6 | 1  | 1  | 0              | 0 |
| C12882T    | F182F | 9/115 (7.83%)   | 35/672 (5.21%)   | 1.5  | 2  | 3  | 2 (1 w/ meta)  | 2 |
| T12957C    | N207N | 3/115 (2.61%)   | 4/672 (0.60%)    | 4.35 | 1  | 0  | 1              | 1 |
| T13015C    | L227L | 1/115 (0.87%)   | 0                | -    | 0  | 1  | 0              | 0 |
| C13029T    | P231P | 1/115 (0.87%)   | 1/672 (0.15%)    | 5.8  | 1  | 0  | 0              | 0 |
| A13104G    | G256G | 3/115 (2.61%)   | 21/672 (3.12%)   | 0.84 | 0  | 2  | 1 w/ meta      | 0 |
| A13152G    | L272L | 2/115 (1.74%)   | 4/672 (0.60%)    | 2.9  | 1  | 1  | 0              | 0 |
| A13263G    | Q309Q | 1/115 (0.87%)   | 2/672 (0.30%)    | 2.9  | 0  | 1  | 0              | 0 |
| A13278G    | M315M | 1/115 (0.87%)   | 8/672 (1.19%)    | 0.73 | 0  | 0  | 1              | 0 |
| T13437C    | P367P | 3/115 (2.61%)   | 4/672 (0.60%)    | 4.35 | 2  | 1  | 0              | 0 |
| A13563G    | L409L | 3/115 (2.61%)   | 32/672 (4.76%)   | 0.37 | 2  | 0  | 0              | 1 |
| G13590A    | L418L | 4/115 (3.48%)   | 19/672 (2.83%)   | 1.23 | 2  | 1  | 0              | 1 |
| T13602C    | Y422Y | 1/115 (0.87%)   | 2/672 (0.30%)    | 2.9  | 0  | 1  | 0              | 0 |
| T13641C    | P435P | 3/115 (2.61%)   | 0                | -    | 0  | 2  | 1 w/ meta      | 0 |
| T13656C    | L440L | 2/115 (1.74%)   | 1/672 (0.15%)    | 11.6 | 2  | 0  | 0              | 0 |
| G13707A    | L457L | 1/115 (0.87%)   | 0                | -    | 0  | 0  | 1              | 0 |
| C13782T    | I482I | 1/115 (0.87%)   | 0                | -    | 0  | 0  | 1              | 0 |
| A13887G    | L517L | 3/115 (2.61%)   | 4/672 (0.60%)    | 4.35 | 0  | 2  | 1 w/ meta      | 0 |
| T13899C    | Y562Y | 1/115 (0.87%)   | 0                | -    | 0  | 0  | 0              | 1 |
| T13962C    | L542L | 2/115 (1.74%)   | 0                | -    | 0  | 2  | 0              | 0 |
| A14013G    | E559E | 1/115 (0.87%)   | 2/672 (0.30%)    | 2.9  | 0  | 0  | 1              | 0 |
| C14067T    | T577T | 1/115 (0.87%)   | 0                | -    | 0  | 0  | 1              | 0 |
| A14133G    | L599L | 3/115 (2.61%)   | 12/672 (1.79%)   | 1.46 | 0  | 3  | 0              | 0 |
| <b>ND6</b> |       |                 |                  |      |    |    |                |   |
| T14200C    | W158W | 2/115 (1.74%)   | 30/672 (4.46%)   | 0.39 | 1  | 0  | 0              | 1 |
| A14233G    | D147D | 1/115 (0.87%)   | 0                | -    | 1  | 0  | 0              | 0 |
| C14281T    | G131G | 1/115 (0.87%)   | 9/672 (1.34%)    | 0.65 | 1  | 0  | 0              | 0 |
| T14287C    | G129G | 1/115 (0.87%)   | 10/672 (1.49%)   | 0.58 | 0  | 0  | 0              | 1 |
| T14308C    | G122G | 4/115 (3.48%)   | 11/672 (1.64%)   | 2.12 | 1  | 2  | 0              | 1 |
| T14319C    | N119N | 1/115 (0.87%)   | 0                | -    | 1  | 0  | 0              | 0 |
| G14364A    | L104L | 12/115 (10.43%) | 42/672 (6.25%)   | 1.67 | 5  | 4  | 2 w/ meta      | 1 |
| T14374C    | V100V | 1/115 (0.87%)   | 0                | -    | 1  | 0  | 0              | 0 |
| T14386C    | L96L  | 1/115 (0.87%)   | 1/672 (0.15%)    | 5.8  | 1  | 0  | 0              | 0 |
| A14464G    | T70T  | 1/115 (0.87%)   | 0                | -    | 1  | 0  | 0              | 0 |
| T14470C    | G68G  | 1/115 (0.87%)   | 29/672 (4.32%)   | 0.2  | 0  | 0  | 1 w/ meta      | 0 |
| G14476A    | V66V  | 7/115 (6.09%)   | 19/672 (2.83%)   | 2.15 | 2  | 2  | 3 (1 w/ meta)  | 0 |
| G14569A    | S35S  | 3/115 (2.61%)   | 64/672 (9.52%)   | 0.27 | 1  | 0  | 1              | 1 |
| A14587G    | G29G  | 1/115 (0.87%)   | 0                | -    | 1  | 0  | 0              | 0 |
| A14605G    | P23P  | 2/115 (1.74%)   | 29/672 (4.32%)   | 0.23 | 0  | 2  | 0              | 0 |
| T14635C    | V13V  | 2/115 (1.74%)   | 0                | -    | 1  | 0  | 0              | 1 |
| C14668T    | M2M   | 32/115 (27.83%) | 237/672 (35.27%) | 0.79 | 15 | 8  | 6 (2 w/ meta)  | 3 |

| SNP/Mutation | Amino acid | Frequency T (this study) (%) | Frequency C (mSNP-Japan)*1 (%) | Frequency (T/C) | No. of cases detected |                   |                |                   |
|--------------|------------|------------------------------|--------------------------------|-----------------|-----------------------|-------------------|----------------|-------------------|
|              |            |                              |                                |                 | NSCLC                 |                   | Colon Ca       |                   |
|              |            |                              |                                |                 | Primary (N=45)        | Metastases (N=37) | Primary (N=22) | Metastases (N=11) |
| <b>COII</b>  |            |                              |                                |                 |                       |                   |                |                   |
| G7600A       | A5A        | 2/115 (0.87%)                | 32/672 (4.76%)                 | 0.18            | 1                     | 0                 | 0              | 1                 |
| G7672A       | M19M       | 1/115 (0.87%)                | 0                              | -               | 0                     | 0                 | 0              | 1                 |
| T7684C       | L33L       | 4/115 (3.48%)                | 29/672 (4.32%)                 | 0.81            | 3                     | 1                 | 1              | 0                 |
| G7702A       | L39L       | 1/115 (0.87%)                | 0                              | -               | 0                     | 1                 | 0              | 0                 |
| T7738C       | T51T       | 1/115 (0.87%)                | 2/672 (0.30%)                  | 2.9             | 0                     | 1                 | 0              | 0                 |
| T7741C       | N52N       | 1/115 (0.87%)                | 0                              | -               | 0                     | 1                 | 0              | 0                 |
| C7747T       | I55I       | 1/115 (0.87%)                | 0                              | -               | 0                     | 0                 | 1              | 0                 |
| T7783C       | L67L       | 1/115 (0.87%)                | 0                              | -               | 0                     | 0                 | 1 w/ meta      | 0                 |
| A7828G       | L81L       | 1/115 (0.87%)                | 2/672 (0.30%)                  | 2.9             | 0                     | 0                 | 1              | 0                 |
| G7852A       | E89E       | 1/115 (0.87%)                | 1/672 (0.15%)                  | 5.8             | 0                     | 1                 | 0              | 0                 |
| C7867T       | S94S       | 1/115 (0.87%)                | 25/672 (3.72%)                 | 0.23            | 0                     | 0                 | 1              | 0                 |
| C7909T       | Y108Y      | 2/115 (0.87%)                | 5/672 (0.74%)                  | 1.18            | 0                     | 1                 | 0              | 1                 |
| C7948T       | Y121Y      | 1/115 (0.87%)                | 2/672 (0.30%)                  | 2.9             | 0                     | 1                 | 0              | 0                 |
| A7960G       | P125P      | 1/115 (0.87%)                | 4/2704 (0.15%)                 | 5.8             | 0                     | 1                 | 0              | 0                 |
| G8020A       | P145P      | 6/115 (5.22%)                | 1/672 (0.15%)                  | 34.8            | 1                     | 2                 | 1              | 2                 |
| T8167A       | G194G      | 1/115 (0.87%)                | 84/672 (12.50%)                | 0.07            | 0                     | 1                 | 0              | 0                 |
| T8200C       | S205S      | 1/115 (0.87%)                | 1/672 (0.14%)                  | 6.2             | 0                     | 0                 | 1              | 0                 |
| G8206A       | M207M      | 4/115 (3.48%)                | 25/672 (3.72%)                 | 0.94            | 1                     | 1                 | 0              | 2                 |
| G8251A       | G222G      | 1/115 (0.87%)                | 15/672 (2.23%)                 | 0.39            | 0                     | 0                 | 0              | 1                 |
| <b>ATP6</b>  |            |                              |                                |                 |                       |                   |                |                   |
| T8598C       | I24I       | 1/115 (0.87%)                | 0                              | -               | 1                     | 0                 | 0              | 0                 |
| T8614C       | L30L       | 2/115 (0.87%)                | 1/672 (0.15%)                  | 5.8             | 1                     | 1                 | 0              | 0                 |
| A8697G       | M57M       | 1/115 (0.87%)                | 0                              | -               | 1                     | 0                 | 0              | 0                 |
| A8700G       | M58M       | 1/115 (0.87%)                | 0                              | -               | 1                     | 0                 | 0              | 0                 |
| A8706G       | M60M       | 1/115 (0.87%)                | 0                              | -               | 1                     | 0                 | 0              | 0                 |
| T8793C       | P89P       | 2/115 (0.87%)                | 4/672 (0.60%)                  | 1.45            | 1                     | 1                 | 0              | 0                 |
| C8829T       | N101N      | 4/115 (3.48%)                | 25/672 (3.72%)                 | 0.94            | 1                     | 3                 | 0              | 0                 |
| C8844T       | I106I      | 1/115 (0.87%)                | 3/672 (0.45%)                  | 1.93            | 0                     | 1                 | 0              | 0                 |
| G8856A       | A110A      | 4/115 (3.48%)                | 5/672 (0.74%)                  | 4.7             | 1                     | 3                 | 0              | 0                 |
| C8964T       | T146T      | 5/115 (4.35%)                | 61/672 (9.08%)                 | 0.48            | 1                     | 2                 | 1              | 1                 |
| A9120G       | L198L      | 2/115 (0.87%)                | 1/672 (0.14%)                  | 6.21            | 0                     | 0                 | 1 w/ meta      | 1                 |
| T9165C       | V213V      | 1/115 (0.87%)                | 7/672 (1.04%)                  | 0.84            | 1                     | 0                 | 0              | 0                 |
| A9180G       | V218V      | 4/115 (3.48%)                | 27/672 (4.02%)                 | 0.87            | 2                     | 0                 | 2              | 0                 |
| <b>CYT6</b>  |            |                              |                                |                 |                       |                   |                |                   |
| T14783C      | L13L       | 65/115 (56.52%)              | 441/672 (65.62%)               | 0.86            | 29                    | 18                | 13 (4 w/ meta) | 5                 |
| A14893G      | L49L       | 2/115 (0.87%)                | 18/672 (2.68%)                 | 0.32            | 1                     | 0                 | 0              | 1                 |
| C14944T      | I66I       | 2/115 (0.87%)                | 28/672 (4.17%)                 | 0.21            | 2                     | 0                 | 0              | 0                 |
| T14968C      | N74N       | 1/115 (0.87%)                | 21/672 (3.13%)                 | 0.28            | 1                     | 0                 | 0              | 0                 |
| C15040T      | I98I       | 1/115 (0.87%)                | 4/672 (0.60%)                  | 1.45            | 1                     | 0                 | 0              | 0                 |
| A15043G      | G99G       | 64/115 (55.65%)              | 442/672 (65.77%)               | 0.85            | 30                    | 16                | 13 (3 w/ meta) | 5                 |
| T15067C      | F107F      | 6/115 (5.22%)                | 23/672 (3.42%)                 | 1.53            | 3                     | 2                 | 1              | 0                 |
| G15106A      | L120L      | 1/115 (0.87%)                | 3/672 (0.45%)                  | 1.93            | 1                     | 0                 | 0              | 0                 |
| T15139C      | Y131Y      | 2/115 (0.87%)                | 1/672 (0.15%)                  | 5.8             | 2                     | 0                 | 0              | 0                 |
| G15148A      | P134P      | 1/115 (0.87%)                | 6/672 (0.89%)                  | 0.98            | 0                     | 1                 | 0              | 0                 |
| G15172A      | G142G      | 1/115 (0.87%)                | 1/672 (0.15%)                  | 5.8             | 1                     | 0                 | 0              | 0                 |
| T15184C      | I146I      | 1/115 (0.87%)                | 6/672 (0.89%)                  | 0.98            | 1                     | 0                 | 0              | 0                 |

|         |       |                 |                  |      |    |    |                |   |
|---------|-------|-----------------|------------------|------|----|----|----------------|---|
| C15223T | D159D | 4/115 (3.48%)   | 25/672 (3.72%)   | 0.94 | 1  | 3  | 0              | 0 |
| A15301G | L185L | 66/115 (57.39%) | 441/672 (65.63%) | 0.87 | 29 | 19 | 13 (4 w/ meta) | 5 |
| G15346A | L200L | 7/115 (6.09%)   | 21/672 (3.13%)   | 1.95 | 1  | 5  | 0              | 1 |
| C15391T | S215S | 1/115 (0.87%)   | 3/672 (0.45%)    | 1.93 | 0  | 0  | 0              | 1 |
| C15518T | L258L | 1/115 (0.87%)   | 16/672 (2.38%)   | 0.37 | 0  | 0  | 1 w/ meta      | 0 |
| C15535T | N263N | 2/115 (0.87%)   | 21/672 (3.13%)   | 0.28 | 0  | 0  | 1 w/ meta      | 1 |
| A15724G | W326W | 1/115 (0.87%)   | 10/672 (1.49%)   | 0.58 | 0  | 0  | 1              | 0 |
| A15874G | M376M | 3/115 (2.61%)   | 23/672 (3.42%)   | 0.76 | 0  | 0  | 2 (1 w/ meta)  | 1 |

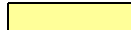

Somatic mutation. Novel mutations are shown in red.

\*1 GiiB-JST mtSN: human mitochondrial genome single nucleotide polymorphism database (<http://mitsnp.tmig.or.jp/>). SNP frequency in patients with Parkinson's disease, Alzheimer's disease, type 2 diabetes w/ and w/o vascular lesion, men w/ and w/o juvenile obese, and centenarians of Gifu and Tokyo.

Supplementary Table S5. Nonsynonymous SNPs and SNVs in the *ND* genes selected to evaluate the association with distant metastasis in NSCLC and colon cancer.

| Gene | SNP/<br>Mutation*1 | Amino acid<br>substitution | Homoplasmy or<br>heteroplasmy    | Frequency<br>(T/C)*2 | Grantham<br>value | Evolutionary<br>conservation<br>of the original<br>amino acid | Conformational<br>change | Reported disease<br>association*3                                  | MutPred<br>Pathogenicity<br>Score*4 | No. of cases detected |                      |                         |                      |                     |                      |                         |                      |
|------|--------------------|----------------------------|----------------------------------|----------------------|-------------------|---------------------------------------------------------------|--------------------------|--------------------------------------------------------------------|-------------------------------------|-----------------------|----------------------|-------------------------|----------------------|---------------------|----------------------|-------------------------|----------------------|
|      |                    |                            |                                  |                      |                   |                                                               |                          |                                                                    |                                     | NSCLC                 |                      | Colon Cancer            |                      | Lung adenocarcinoma |                      | Colon adenocarcinoma    |                      |
|      |                    |                            |                                  |                      |                   |                                                               |                          |                                                                    |                                     | Primary<br>(n=45)     | Metastases<br>(n=37) | Primary<br>(n=22)       | Metastases<br>(n=11) | Primary<br>(n=45)   | Metastases<br>(n=37) | Primary<br>(n=22)       | Metastases<br>(n=11) |
|      | T3394C             | Y30H                       | Homoplasmy                       | 2.09                 | 83                | Conserved                                                     |                          | LHON / Diabetes /<br>CPT deficiency / high<br>altitude adaptation  | 0.783                               | 1                     | 3                    | 1 w/<br>distant<br>meta | 0                    | 0                   | 3                    | 1 w/<br>distant<br>meta | 0                    |
|      | T3398C             | M31T                       | Homoplasmy                       | 2.9                  | 81                | Conserved                                                     |                          | DMDF+HCM / GDM /<br>possibly LVNC<br>cardiomyopathy-<br>associated | 0.751                               | 0                     | 0                    | 1                       | 0                    | 0                   | 0                    | 0                       | 0                    |
| ND1  | C3497T             | A64V                       | Homoplasmy                       | 2.04                 | 64                |                                                               | Yes                      | LHON                                                               | 0.413                               | 1                     | 5                    | 0                       | 1                    | 1                   | 5                    | 0                       | 0                    |
|      | C3689G             | A128G                      | Homoplasmy                       | -                    | 60                |                                                               | Yes                      |                                                                    | 0.747                               | 0                     | 1                    | 0                       | 1                    | 0                   | 1                    | 0                       | 1                    |
|      | G3709A             | A135T                      | Heteroplasmy or<br>Heterogeneous | -                    | 58                | Conserved                                                     | Yes                      |                                                                    | 0.774                               | 1                     | 0                    | 0                       | 0                    | 0                   | 0                    | 0                       | 0                    |
|      | G3955A             | A217T                      | Heteroplasmy or<br>Heterogeneous | -                    | 58                |                                                               | Yes                      |                                                                    | 0.736                               | 0                     | 0                    | 0                       | 1                    | 0                   | 0                    | 0                       | 0                    |
| ND3  | T10363C            | L102P                      | Heteroplasmy or<br>Heterogeneous | -                    | 98                | Conserved                                                     |                          |                                                                    | 0.746                               | 0                     | 1                    | 0                       | 0                    | 0                   | 1                    | 0                       | 0                    |
| ND4  | C11409T            | P217L                      | Heteroplasmy or<br>Heterogeneous | -                    | 98                | Conserved                                                     |                          |                                                                    | 0.83                                | 0                     | 1                    | 0                       | 0                    | 0                   | 1                    | 0                       | 0                    |
|      | T12338C            | M1T                        | Homoplasmy                       | 3                    | 81                | Conserved                                                     |                          | DEAF1555 increased<br>penetrance / LHON                            | 0.966                               | 0                     | 0                    | 1                       | 0                    | 0                   | 0                    | 1                       | 0                    |
|      | C12813A            | Y159STOP                   | Heteroplasmy or<br>Heterogeneous | -                    | -                 |                                                               | Truncated                |                                                                    | -                                   | 0                     | 1                    | 0                       | 0                    | 0                   | 1                    | 0                       | 0                    |
| ND5  | G13103A            | G256E                      | Heteroplasmy or<br>Heterogeneous | -                    | 98                | Conserved                                                     |                          |                                                                    | 0.834                               | 1                     | 0                    | 0                       | 0                    | 0                   | 0                    | 0                       | 0                    |
|      | G13366A            | G344STOP                   | Heteroplasmy or<br>Heterogeneous | -                    | -                 |                                                               | Truncated                |                                                                    | -                                   | 0                     | 0                    | 1<br>(same case)        | 0                    | 0                   | 0                    | 1<br>(same case)        | 0                    |
|      | T14138C            | L601P                      | Homoplasmy                       | -                    | 98                | Conserved                                                     |                          |                                                                    | 0.762                               | 0                     | 0                    | 0                       | 1                    | 0                   | 0                    | 0                       | 1                    |
| ND6  | 14504delA          | L57STOP                    | Homoplasmy                       | -                    | -                 |                                                               | Truncated                |                                                                    | -                                   | 0                     | 0                    | 1<br>(same case)        | 0                    | 0                   | 0                    | 1<br>(same case)        | 0                    |

\*1 Novel mutations found in this study are shown in red.

\*2 Calculated on the basis of the SNP frequency (C) in persons with Parkinson's disease, Alzheimer's disease and type 2 diabetes w/ and w/o vascular lesion and men w/ and w/o juvenile obese, and centenarians of Gifu and Tokyo in the database of GiIB-JST mtSN; human mitochondrial genome single nucleotide polymorphism database (<http://mitsnp.tmg.or.jp/>) and the SNP frequency (T) in this study.

\*3 Data from MITOMAP database (<http://www.mitomap.org/MITOMAP>). LHON; Leber hereditary optic neuropathy, CPT; Carnitine Palmitoyltransferase, DMDF; Diabetes mellitus + Deafness, HCM; Hypertrophic cardiomyopathy, GDM; Gestational diabetes mellitus, LVNC; Left ventricular noncompaction.

\*4 Predicted pathogenicity score (Ref. 18). The amino acid variants showing more than 0.7 are considered as a high pathogenicity score group.

**Supplementary Table S6. PCR primers used for sequencing and qPCR.**

| Primer     | Sequence (5'-3')          | Accession No. | Application |                |      |
|------------|---------------------------|---------------|-------------|----------------|------|
| ND1-1F     | AACAGGGTTTGTAAAGATGGC     | NC_005089.1   | Sequencing  |                |      |
| ND1-1R     | GGTTCGATTCTCATAGTCCTA     |               |             |                |      |
| ND1-2F     | CATCAAACCTCAAACCTACGCCCT  |               |             |                |      |
| ND1-2R     | TTCGGTTGGTCTCTGCTAGT      |               |             |                |      |
| ND2-1F     | ATGAGAATCGAACCCTATCCC     |               |             |                |      |
| ND2-1R     | TAAGATTTTGCCTAGCTGGGT     |               |             |                |      |
| ND2-2F     | GACATCCGGCCTGCTTCTT       |               |             |                |      |
| ND2-2R     | GAGTGGGGTTTTGCAGTCC       |               |             |                |      |
| ND3-ND4L-F | CCATCTATTGATGAGGGTCTT     |               |             |                |      |
| ND3-ND4L-R | ATAATTAGGCTGTGGGTGGTT     |               |             |                |      |
| ND4-1F     | CTAGTATATCGCTCACACCTCA    |               |             |                |      |
| ND4-1R     | GCTTCGACATGGGCTTTAGGGA    |               |             |                |      |
| ND4-2F     | CTACTCACTCTCACTGCCCAAG    |               |             |                |      |
| ND4-2R     | GGGAATTAGGGAAGTCAGGGT     |               |             |                |      |
| ND5-1F     | CTCACAAGAAGTCTAACTCATGCC  |               |             |                |      |
| ND5-1R     | CTAGTAGTGGGGTGAGGCTTGATTA |               |             |                |      |
| ND5-2F     | CATCGGCTGAGAGGGCGTAGGAAT  |               |             |                |      |
| ND5-2R     | GAGAGTAATAGATAGGGCTCAGGCG |               |             |                |      |
| ND5-3F     | CTCCGGGTCCATCATCCACAACCT  |               |             |                |      |
| ND5-3R     | GATCCTATTGGTGCGGGGGCTTTG  |               |             |                |      |
| ND6-F      | CAATTTACAGCACCAATCTCCA    |               |             |                |      |
| ND6-R      | TATTAGGGGGTTAGTTTTGCG     |               |             |                |      |
| COII-F     | ACACATTCTGAAGAACCCTAT     |               |             |                |      |
| COII-R     | TTTAGTTGGGGCATTCTACTG     |               |             |                |      |
| ATP6-F     | TAAATACTACCGTATGGCCCA     |               |             |                |      |
| ATP6-R     | CGTTATGGAGTGGAAGTGAAA     |               |             |                |      |
| CYTB-F1    | ACTAAACCCACACTCAACAGAAAG  |               |             |                |      |
| CYTB-F2    | GTCATTAAGGAGAGAAGG        |               |             |                |      |
| CYTB-F2    | ATACATTGGGACAGACCTAGTTC   |               |             |                |      |
| CYTB-R2    | CTTTGGGTGCTAATGGTGGAGT    |               |             |                |      |
| HIF1a-F    | CCATGCCCCAGATTCAAGATCA    |               |             | NM_001313919.1 | qPCR |
| HIF1a-R    | TCACTGGGACTGTTAGGCTGG     |               |             |                |      |
| Pdh1a-F    | CCTCCCTTTGAAGTGCCTGG      | M76727.1      |             |                |      |
| Pdh1a-R    | AGCACAGAGTTCCTTACGCT      |               |             |                |      |
| Pdhb-F     | AAAGGCAAGGGACCCACATC      | NM_024221     |             |                |      |
| Pdhb-R     | TGGCTTCGATGTCCATTGGT      |               |             |                |      |
| Pdk1-F     | AGGATCGGTTATGCCAACTGT     | NM_172665     |             |                |      |
| Pdk1-R     | AACCAGGAACCTCACACCCC      |               |             |                |      |
| MMP11-F    | CACCGTCATCACCCCTGTGAA     | NM_008606.3   |             |                |      |
| MMP11-R    | GGTTCGGGCATTTCAGTACA      |               |             |                |      |
| Plaur-F    | ACTACCGTGCTTCGGGAATG      | NM_011113.4   |             |                |      |
| Plaur-R    | GCCTGTTGCAGAGGTTTGTG      |               |             |                |      |
| Cel7-F     | GATCTCTGCCACGCTTCTGT      | NM_013654     |             |                |      |
| Cel7-R     | ATAGCCTCCTCGACCCACTT      |               |             |                |      |
| CD44-F     | AGAAGAGCACCCCAGAAAGC      | CT010324.1    |             |                |      |
| CD44-R     | TCTGAAACCACGTCTCCTGC      |               |             |                |      |
| Kras-F     | GCGCTGACCTAGGGAATGTT      | NM_021284.6   |             |                |      |
| Kras-R     | TCACTTCACAGCACGTACTCC     |               |             |                |      |
| Myc-F      | ACAGTGTTCTCTGCCTCTGC      | NM_001177352  |             |                |      |
| Myc-R      | GCTGTACGGAGTCGTAGTCG      |               |             |                |      |
| Gapdh-F    | TGCACCACCAACRGCTTAG       | NM_008084     |             |                |      |
| Gapdh-R    | GGATGCAGGGATGATGTTT       |               |             |                |      |



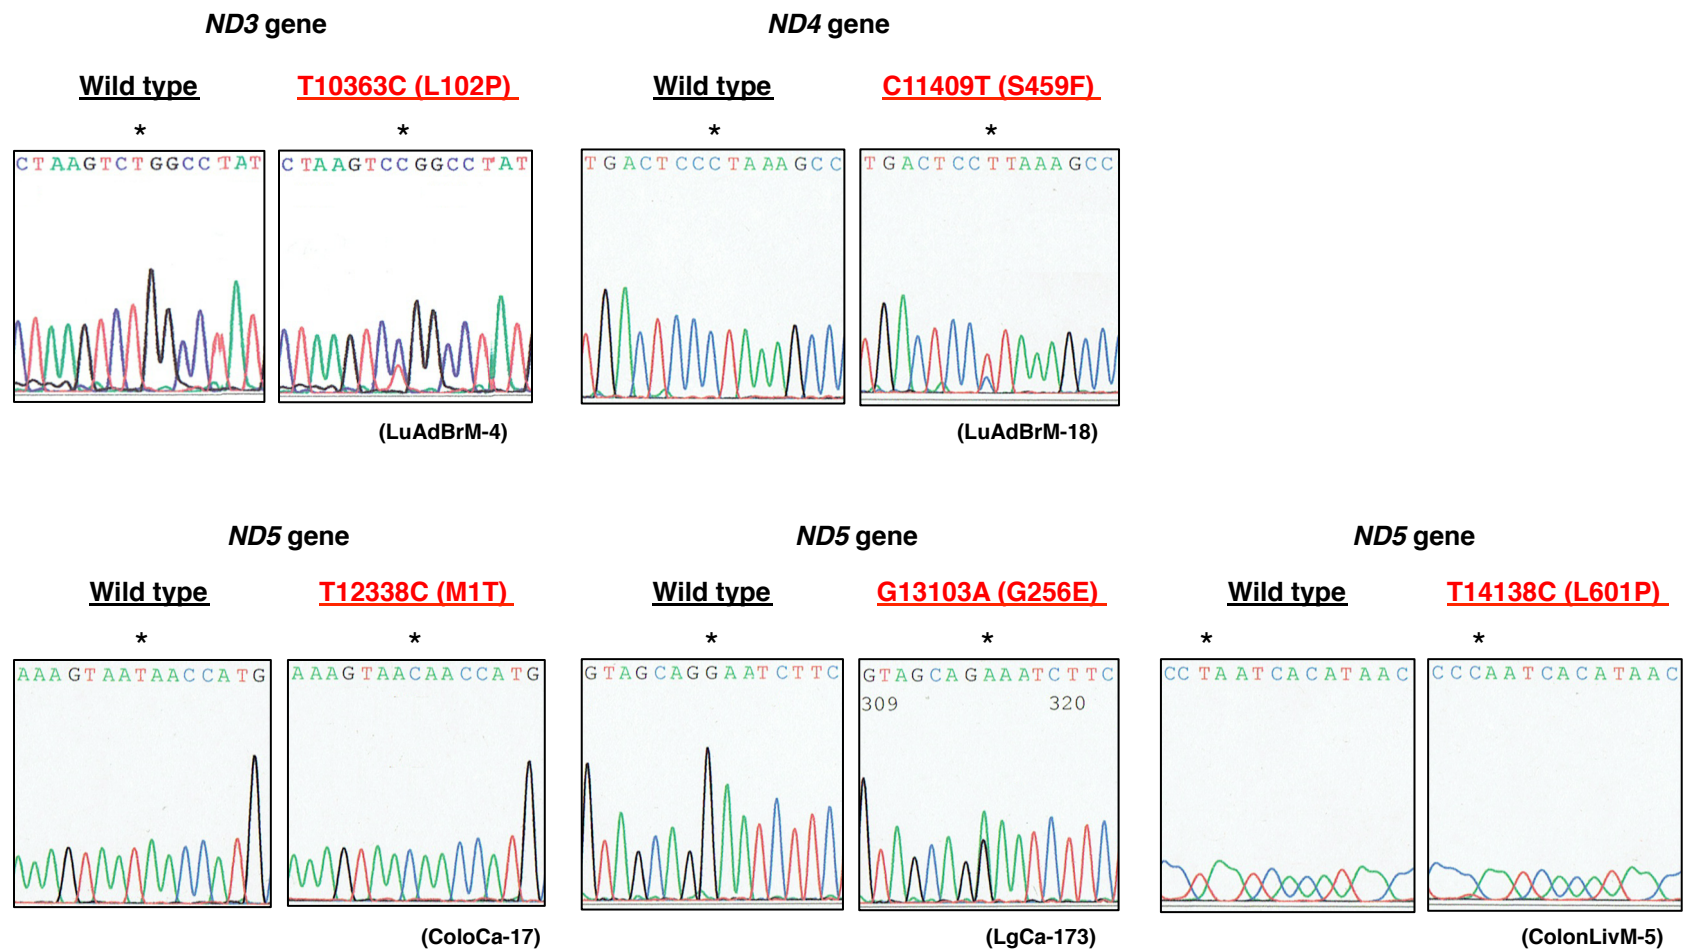

**Supplementary Fig. S1.** Selected SNVs found in the clinical samples.

### T10363C

| <b>ND3 a.a. sequences</b>      | 98             | 101      | 102    | 108     | 118 |
|--------------------------------|----------------|----------|--------|---------|-----|
| <i>Homo sapiens</i>            | MSSLLLIIL ALS  | <b>L</b> | AYEWLQ | KGLDWTE |     |
| <b>LuAdBrM-4 (L102P)</b>       | MSSLLLIIL ALS  | <b>P</b> | AYEWLQ | KGLDWTE |     |
| <i>Mus musculus</i>            | IMAFILVTIL SLG | <b>L</b> | AYEWTQ | KGLEWTE |     |
| <i>Bos taurus</i>              | TMALFLIILL AVS | <b>L</b> | AYEWTQ | KGLEWTE |     |
| <i>Gallus gallus</i>           | TWATIIALL TFG  | <b>L</b> | IYEWLQ | GGLEWAE |     |
| <i>Xenopus laevis</i>          | LWAALILTLL TLG | <b>L</b> | IYEWLQ | GGLEWAE |     |
| <i>Salmo salar</i>             | AWSAAVLALL TLG | <b>L</b> | IYEWLQ | GGLEWAE |     |
| <i>Drosophila melanogaster</i> | ITSIIFILIL LIG | <b>L</b> | YHEWNQ | GMLNWSN |     |

### G13103A (G256E)

| <b>ND5 a.a. sequences</b>      | 252            | 255      | 256    | 262        | 272 |
|--------------------------------|----------------|----------|--------|------------|-----|
| <i>Homo sapiens</i>            | VSALLHSSTM VVA | <b>G</b> | IFLLIR | FHPLAENSPL |     |
| <b>LgCa-173 (G256E)</b>        | VSALLHSSTM VVA | <b>E</b> | IFLLIR | FHPLAENSPL |     |
| <i>Mus musculus</i>            | VSALLHSSTM VVA | <b>G</b> | IFLLVR | FHPLTTNNF  |     |
| <i>Bos taurus</i>              | VSALLHSSTM VVA | <b>G</b> | IFLLIR | FYPLTENNKY |     |
| <i>Gallus gallus</i>           | VSALLHSSTM VVA | <b>G</b> | IFLLIR | THPFLSSNKT |     |
| <i>Xenopus laevis</i>          | VSALLHSSTM VVA | <b>G</b> | IFLLIR | ISPMMNNQT  |     |
| <i>Salmo salar</i>             | VSALLHSSTM VVA | <b>G</b> | IFLLIR | LHPLMENNQT |     |
| <i>Drosophila melanogaster</i> | VSALVHSSTL VTA | <b>G</b> | VYLLIR | FNIILSTSWL |     |

### C11409T

| <b>ND4 a.a. sequences</b>      | 213            | 216      | 217    | 223        | 233 |
|--------------------------------|----------------|----------|--------|------------|-----|
| <i>Homo sapiens</i>            | MVKMPYGLH LWL  | <b>P</b> | KAHVEA | PIAGSMVLAA |     |
| <b>LuAdBrM-18 (P217L)</b>      | MVKMPYGLH LWL  | <b>L</b> | KAHVEA | PIAGSMVLAA |     |
| <i>Mus musculus</i>            | LIKMPYGVH LWL  | <b>P</b> | KAHVEA | PIAGSMILAA |     |
| <i>Bos taurus</i>              | MVKMPYGLH LWL  | <b>P</b> | KAHVEA | PIAGSMVLAA |     |
| <i>Gallus gallus</i>           | MVKAPYGLH LWL  | <b>P</b> | KAHVEA | PIAGSMLLAA |     |
| <i>Xenopus laevis</i>          | MVKMPYGLH LWL  | <b>P</b> | KAHVEA | PIAGSMVLAA |     |
| <i>Salmo salar</i>             | LVKMPVYGVH LWL | <b>P</b> | KAHVEA | PIAGSMILAA |     |
| <i>Drosophila melanogaster</i> | LVKMPMFLVH LWL | <b>P</b> | KAHVEA | PVSGSMILAG |     |

### T14138C

| <b>ND5 a.a. sequences</b>      | 590                   | 600      | 601    |
|--------------------------------|-----------------------|----------|--------|
| <i>Homo sapiens</i>            | GMIKLYFLSP FFFPLVLTLL | <b>L</b> | IT     |
| <b>ColoLivM-5 (L601P)</b>      | GMIKLYFLSP FFFPLVLTLL | <b>P</b> | IT     |
| <i>Mus musculus</i>            | GLIKLYFMSN FLINIILIII | <b>L</b> | YSINLE |
| <i>Bos taurus</i>              | GLIKLYFLST FLITILISMI | <b>L</b> | FNPFHE |
| <i>Gallus gallus</i>           | GLIKSYLGST FALTILTIL  | <b>L</b> | IQK    |
| <i>Xenopus laevis</i>          | GLIKTYLTLT FLMTSAIIIT | <b>L</b> | F      |
| <i>Salmo salar</i>             | GMIKTYLTLT FFLSTALAVL | <b>L</b> | TLT    |
| <i>Drosophila melanogaster</i> | NSLKIYLLW FVFWILILLI  | <b>L</b> | LFL    |

**Supplementary Fig. S2.** Selected SNVs found in clinical samples that cause the substitution of evolutionarily highly conserved amino acids.
